# Supplementary material for: Variation in Linked Selection and Recombination Drive Genomic Divergence during Allopatric Speciation of European and American Aspens
Source: PubMed Central journal article supplement — Mol Biol Evol. 2016 Mar 15;33(7):1754–67. doi: 10.1093/molbev/msw051 (PMC4915356; doi:10.1093/molbev/msw051), 2016-03-15
Supplement: supp_msw051_Supplementary_FiguresS1_S4.pdf [file supp_msw051_Supplementary_FiguresS1_S4.pdf]

1 **Supplementary Figures S1-S4**

2

3

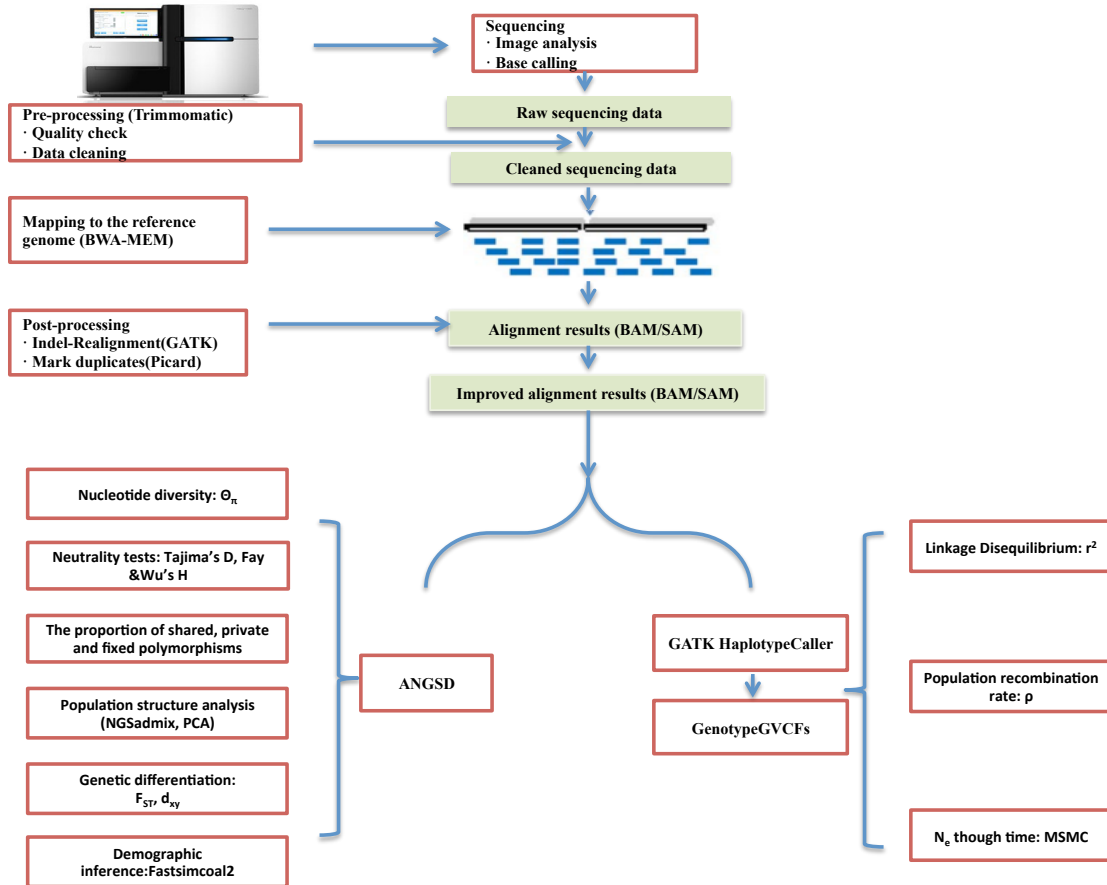

4

5

6 **Figure S1.** Analysis workflow in this study.

7

8

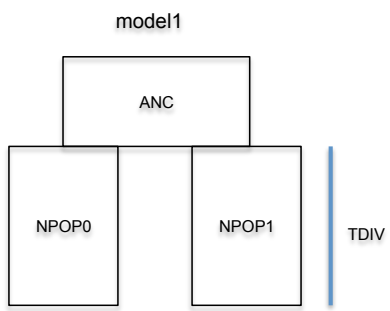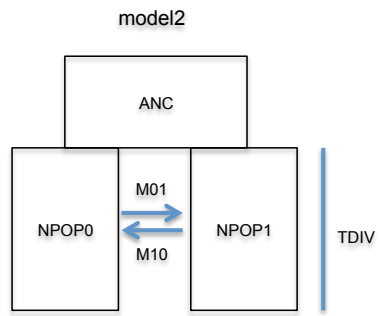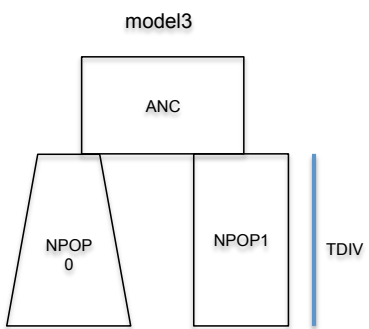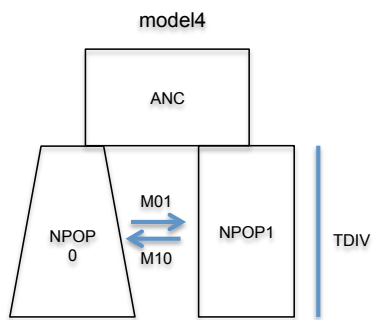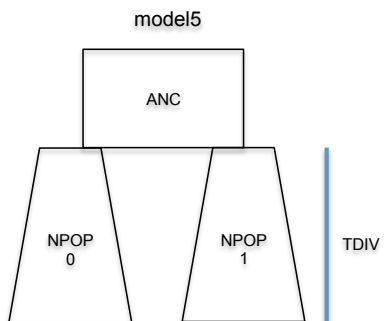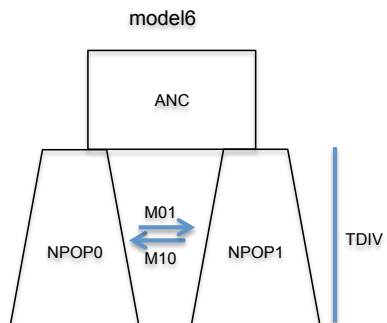

9  
10  
11  
12

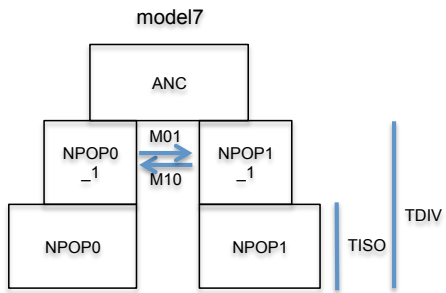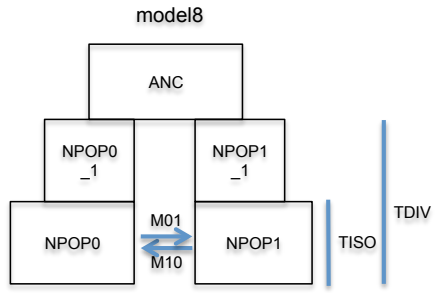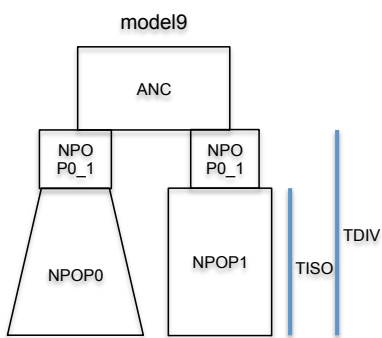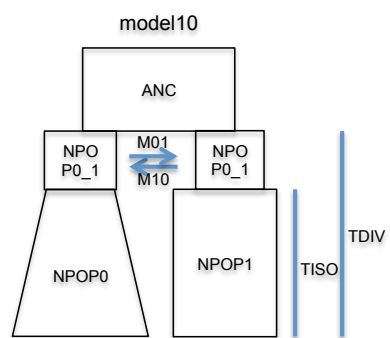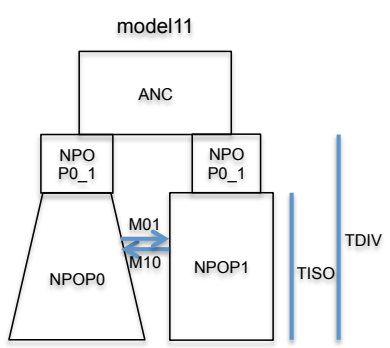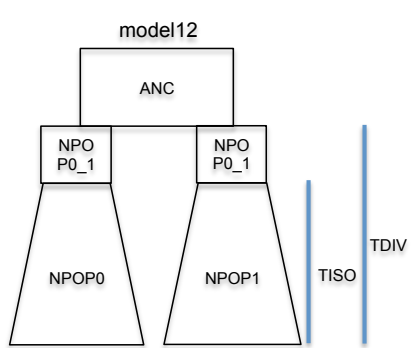

13  
14

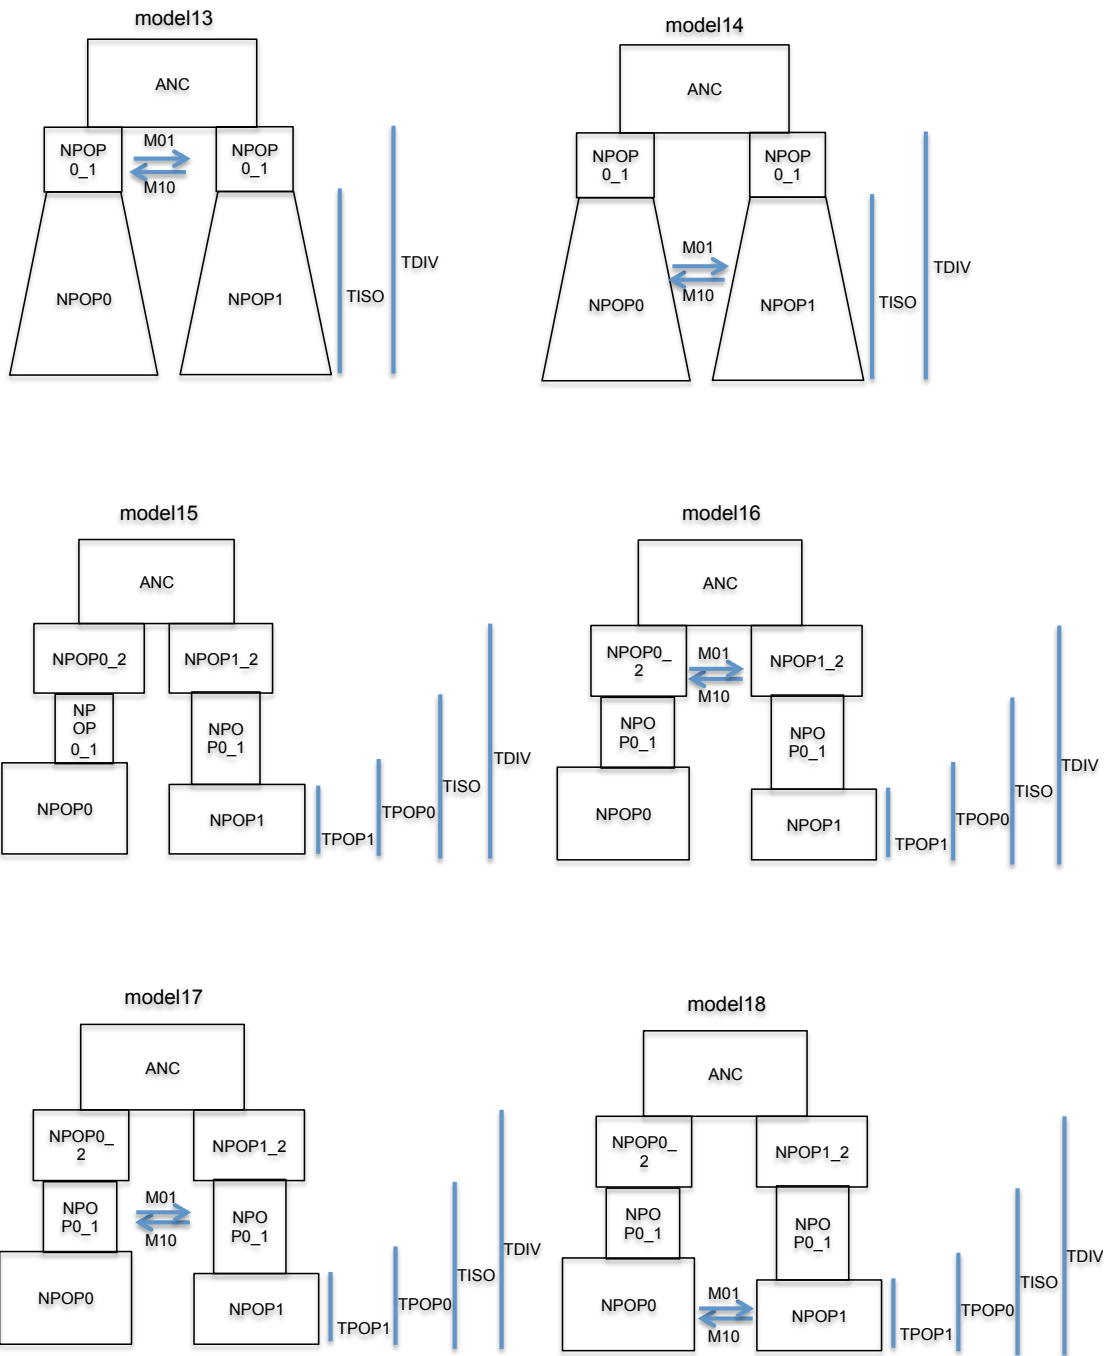

15

16 **Figure S2.** Tested demographic models. Model11, isolation of two species without  
 17 gene flow; model2, isolation of two species with asymmetric gene flow; model3,  
 18 isolation of two species with exponential population size change in *P. tremuloides* and  
 19 stepwise population size change in *P. tremula*, no gene flow; model4, isolation of two  
 20 species with exponential population size change in *P. tremuloides* and stepwise  
 21 population size change in *P. tremula*, with asymmetric gene flow; model5, isolation

22 of two species with exponential population size changes in both species, no gene  
23 flow; model6, isolation of two species with exponential population size changes in  
24 both species, with asymmetric gene flow; model7, isolation of two species with  
25 stepwise population size changes in both species, asymmetric gene flow in the early  
26 stage of species divergence until the time of  $T_{ISO}$ , no gene flow afterwards; model8,  
27 isolation of two species with stepwise population size changes in both species, no  
28 gene flow in the early stage of species divergence until the time of  $T_{ISO}$ , asymmetric  
29 gene flow afterwards; model9-model11, isolation of two species with two steps of  
30 population size changes in both species, both species experienced stepwise population  
31 size changes until the time of  $T_{ISO}$ , afterwards, *P. tremuloides* experienced  
32 exponential population size change, and *P. tremula* experienced another stepwise  
33 change, the difference between models is the occurrence and the time of gene flow  
34 between species; model12-model14, isolation of two species with two steps of  
35 population size changes in both species, both species experienced stepwise population  
36 size changes until the time of  $T_{ISO}$ , afterwards, both species experienced exponential  
37 population size changes, the difference between models is the occurrence and the time  
38 of gene flow between species ; model 15-model18, isolation of two species with three  
39 steps of stepwise population size changes in both species, the difference between  
40 models is the occurrence and the time of gene flow between species.

41  
42  
43  
44  
45  
46  
47  
48  
49  
50  
51  
52  
53  
54  
55

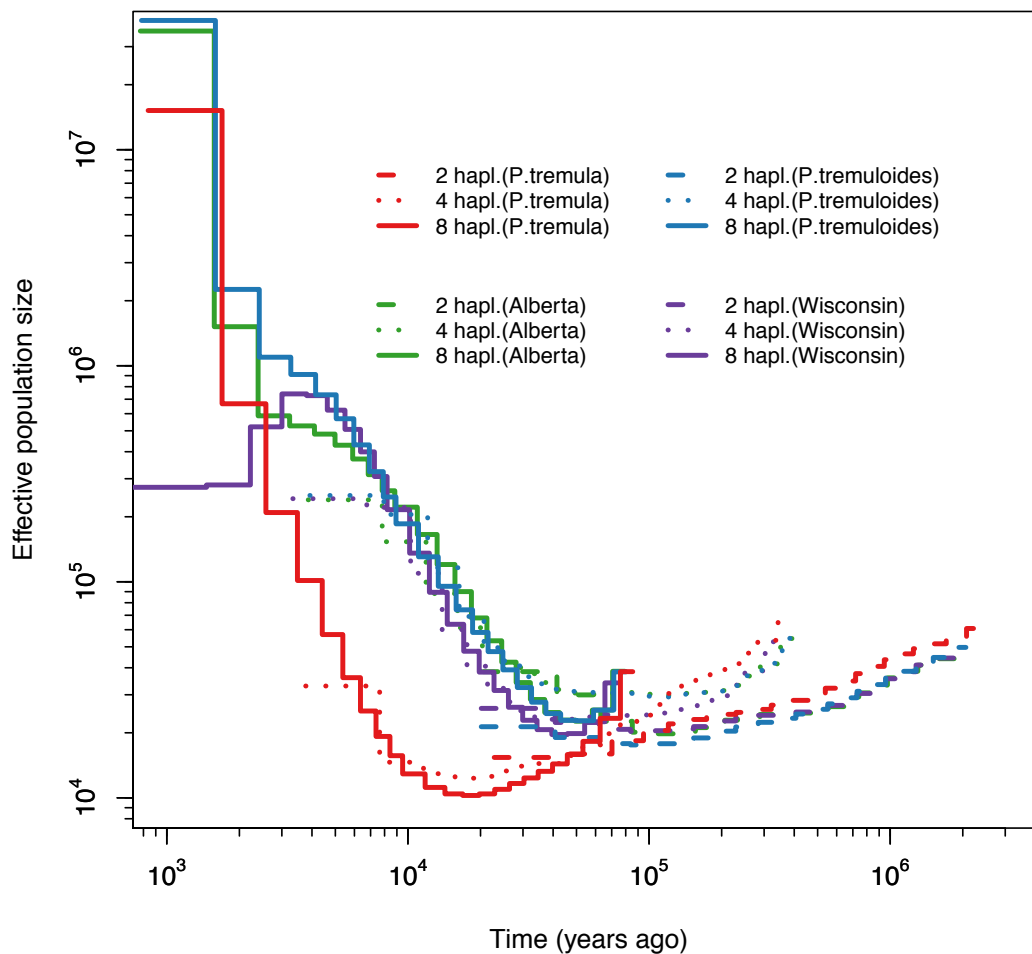

56

57

58 **Figure S3.** Comparative estimates of the effective population size ( $N_e$ ) changes for  
 59 subpopulations of Alberta (green line) and Wisconsin (purple line) of *P. tremuloides*  
 60 from Multiple Sequential Markovian Coalescent (MSMC) analyses, which were then  
 61 compared to the pooled samples of *P. tremuloides* (blue line) and *P. tremula* (red  
 62 line). All estimations were based on the inference from two (dashed), four (dotted)  
 63 and eight (solid) phased haplotypes in the four groups of populations, respectively.  
 64 Time scale on the x-axis is calculated assuming a neutral mutation rate per generation  
 65 ( $\mu$ ) =  $3.75 \times 10^{-8}$  and generation time ( $g$ ) = 15 years.

66

67

68

69

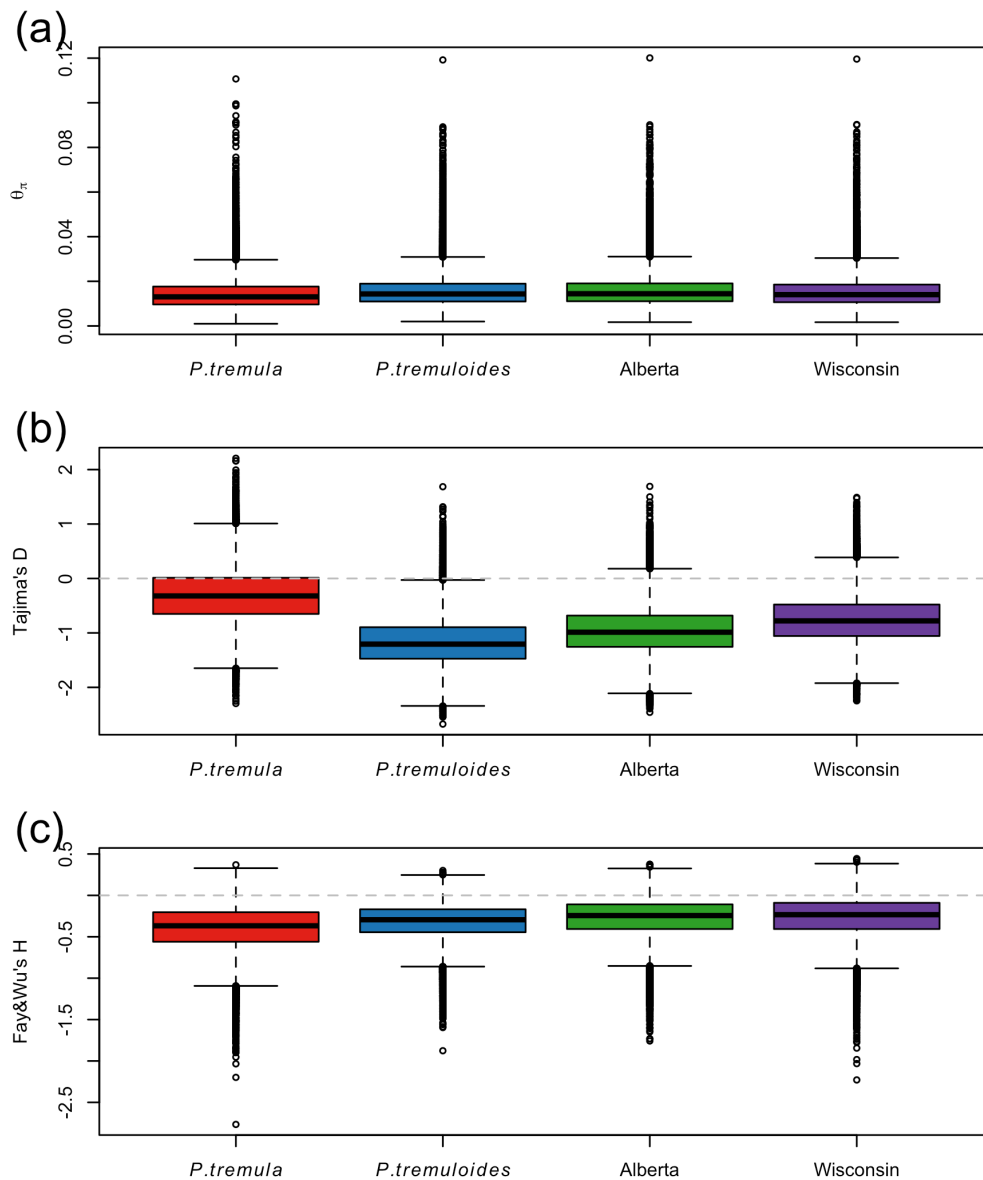

70

71

72 **Figure S4.** The distributions of estimates of (a) nucleotide diversity ( $\theta_{\pi}$ ), (b) Tajima's  
 73 D and (c) Fay & Wu's H in *P. tremula*, *P. tremuloides* and population of Alberta and  
 74 Wisconsin in *P. tremuloides* over 10 Kbp non-overlapping windows. The dashed grey  
 75 line in (b) and (c) indicate the expected values of Tajima's D and Fay & Wu's H from  
 76 neutral expectations.

77
