# Supplementary material for: Variation in Linked Selection and Recombination Drive Genomic Divergence during Allopatric Speciation of European and American Aspens
Source: PubMed Central journal article supplement — Mol Biol Evol. 2016 Mar 15;33(7):1754–67. doi: 10.1093/molbev/msw051 (PMC4915356; doi:10.1093/molbev/msw051), 2016-03-15
Supplement: supp_msw051_Supplementary_FiguresS5_S13.pdf [file supp_msw051_Supplementary_FiguresS5_S13.pdf]

1 **Supplementary Figures S5-S13**

2  
3  
4  
5

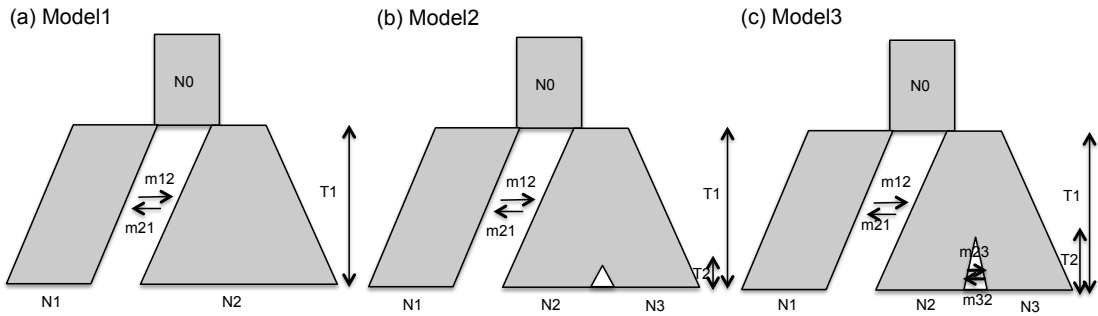

6

7 **Figure S5.** Demographic models used for the coalescent simulation. (a) Model1, the  
8 best-fitting model inferred by *fastsimcoal2*. N1, N2 and N0 denote the effective  
9 population size of *P. tremula*, *P. tremuloides* and their ancestral population. m12,  
10 m21, T1 indicate the migration rates and divergence time between the two species,  
11 respectively. (b) Model2, the best-fitting model inferred by *fastsimcoal2* but with the  
12 population subdivision of *P. tremuloides*, where we assume no gene flow occurred  
13 between the two subpopulations. (c) Model3, the best-fitting model inferred by  
14 *fastsimcoal2* but with the population subdivision of *P. tremuloides*, where we assume  
15 that gene flow occurred between the two subpopulations. All parameters in model 2  
16 and 3 are the same as in model 1 except N2 and N3 represent the effective population  
17 sizes of population Alberta and Wisconsin in *P. tremuloides*, respectively. m23, m32  
18 and T2 indicate the migration rates and the time of divergence between the two  
19 subpopulations of *P. tremuloides*. The demographic parameters used in each model  
20 are shown in Table S5.

21  
22  
23  
24  
25  
26  
27

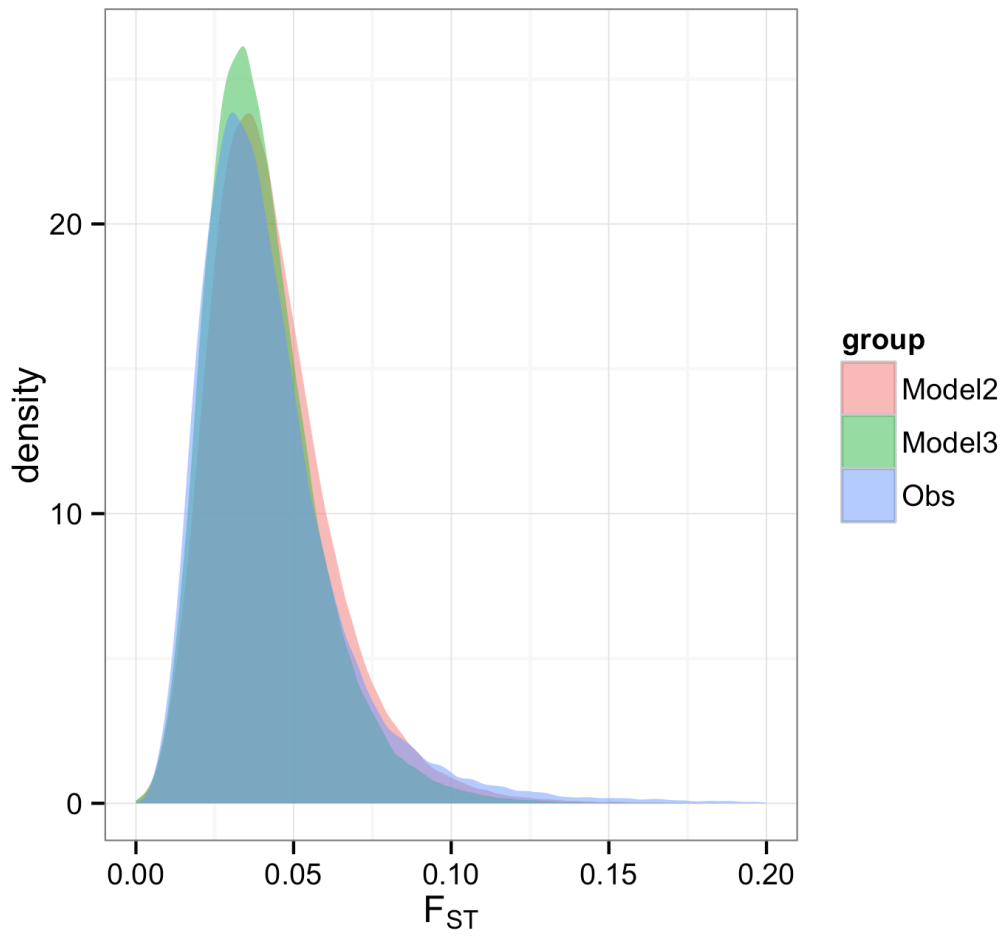

28

29

30 **Figure S6.** The distribution of  $F_{ST}$  values between the subpopulation Alberta and  
31 Wisconsin of *P. tremuloides* in the observed data (blue) and in the simulated data  
32 corresponding to model 2 (red) and model3 (green) as shown in Figure S5.

33

34

35

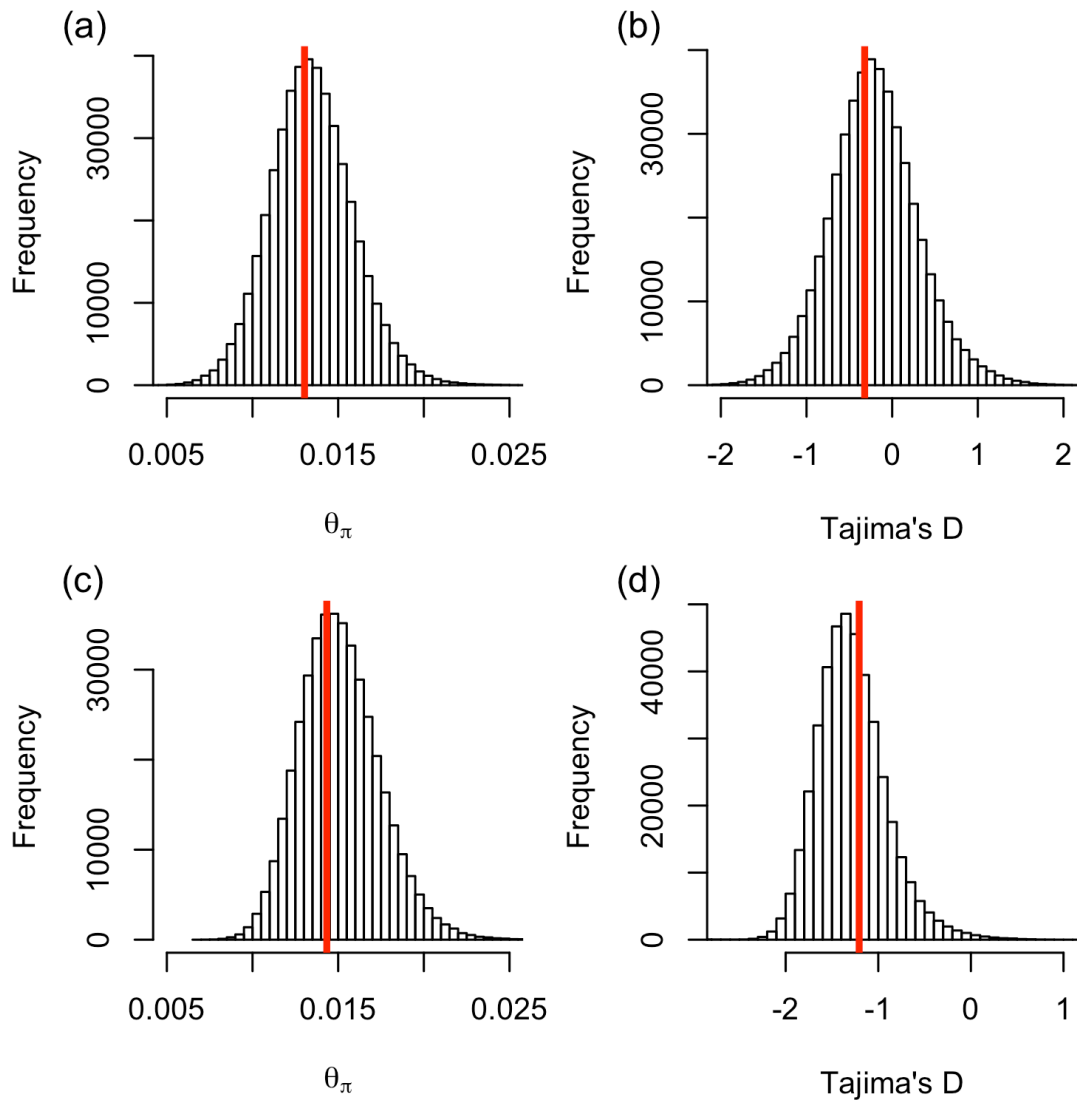

36

37

38 **Figure S7.** Predictive distribution of 100,000 simulated values of nucleotide diversity  
 39 ( $\theta_\pi$ ) and Tajima's D under the best-fitting demographic model inferred by  
 40 *fastsimcoal2* (histogram) (Model 1 as shown in Figure S5) in *P. tremula* (a,b) and *P.*  
 41 *tremuloides* (c,d). Red horizontal bars represent the averages values obtained from the  
 42 observed data. The length of the simulated region is 10 Kbp.

43

44

45

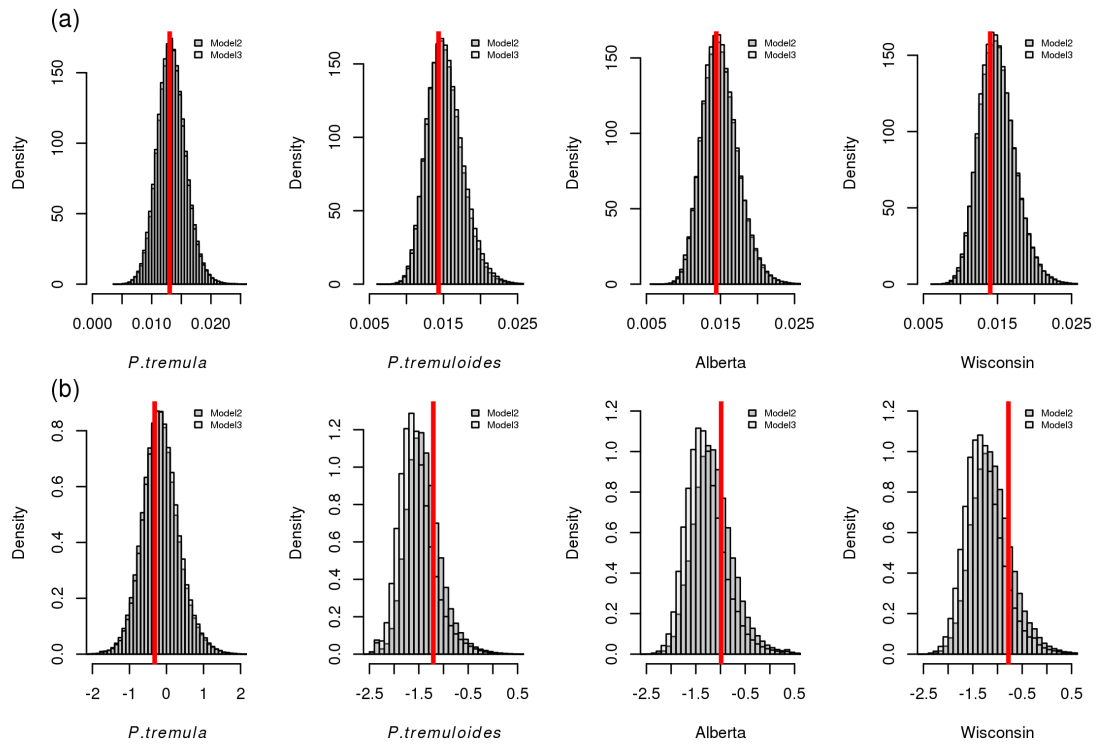

46

47 **Figure S8.** Predictive distribution of 100,000 simulated values of (a) nucleotide  
 48 diversity ( $\theta_{\pi}$ ) and (b) Tajima's D, under the model 2 and model 3 as shown in Figure  
 49 S5 (histogram), in *P. tremula*, pooled samples of *P. tremuloides*, subpopulations of  
 50 Alberta and Wisconsin in *P. tremuloides*, respectively. Red horizontal bars represent  
 51 the averages values obtained from the observed data. The length of the simulated  
 52 region is 10 Kbp.

53

54

55

56

57

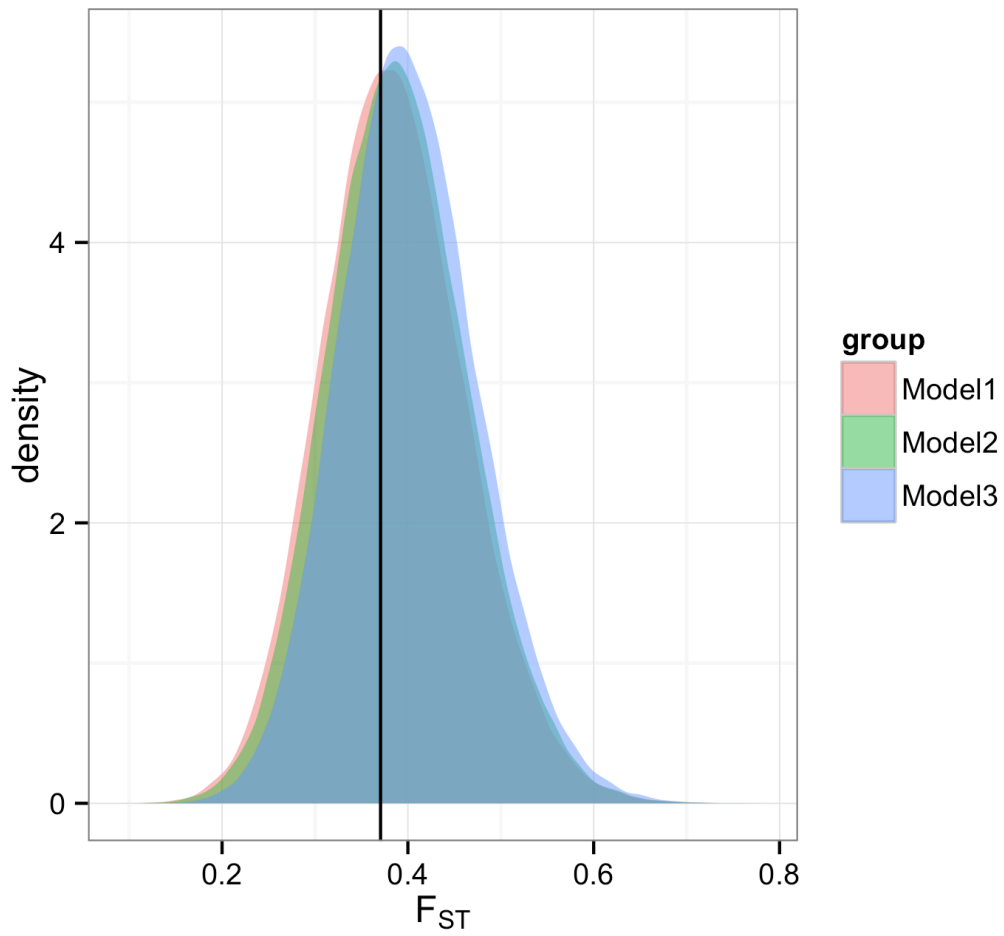

58

59

60 **Figure S9.** Predictive distributions of 100,000 simulated  $F_{ST}$  values between *P.*  
 61 *tremula* and *P. tremuloides* under the model 1, 2, and 3 as shown in Figure S5. The  
 62 length of the simulated region is 10 Kbp. The black horizontal bar represent the mean  
 63  $F_{ST}$  value obtained from the observed data.

64

65

66

67

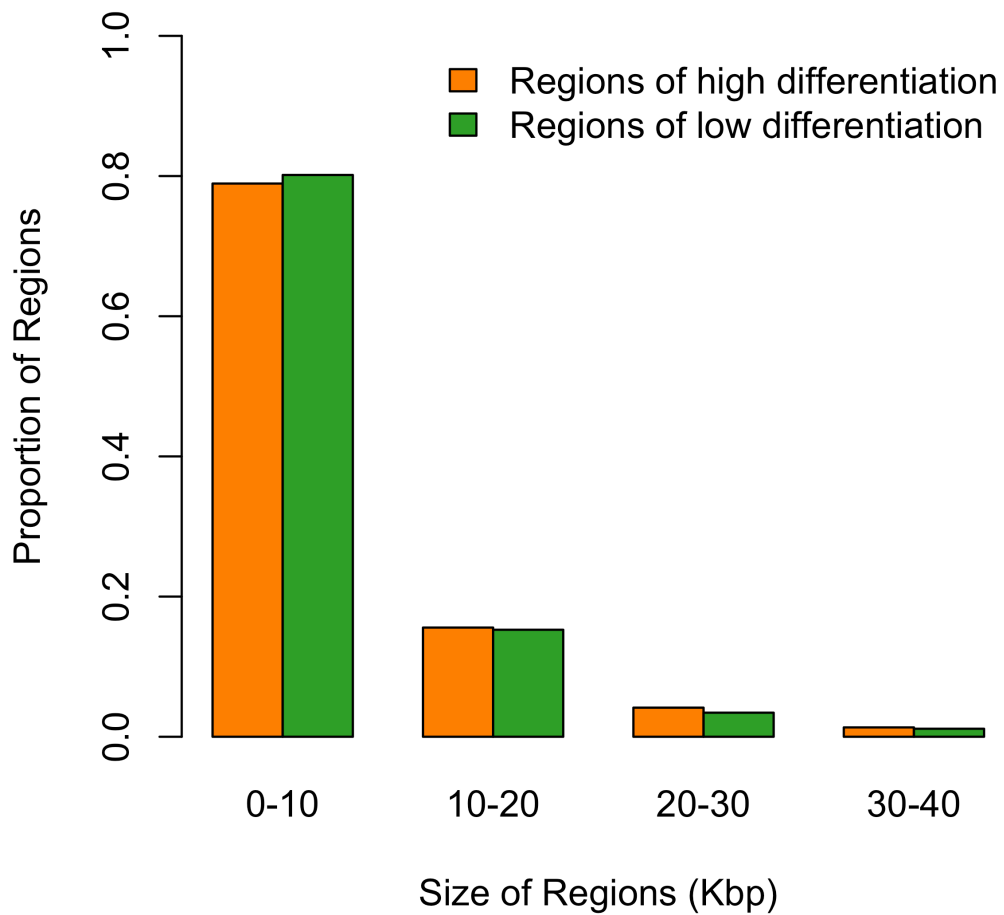

68

69 **Figure S10.** The physical size distributions (Kbp) of regions displaying significantly  
 70 high (orange bars) and low (green bars) genetic differentiation between *P. tremula*  
 71 and *P. tremuloides*. Here, all consecutive windows are considered as a single larger  
 72 region.

73

74

75

76

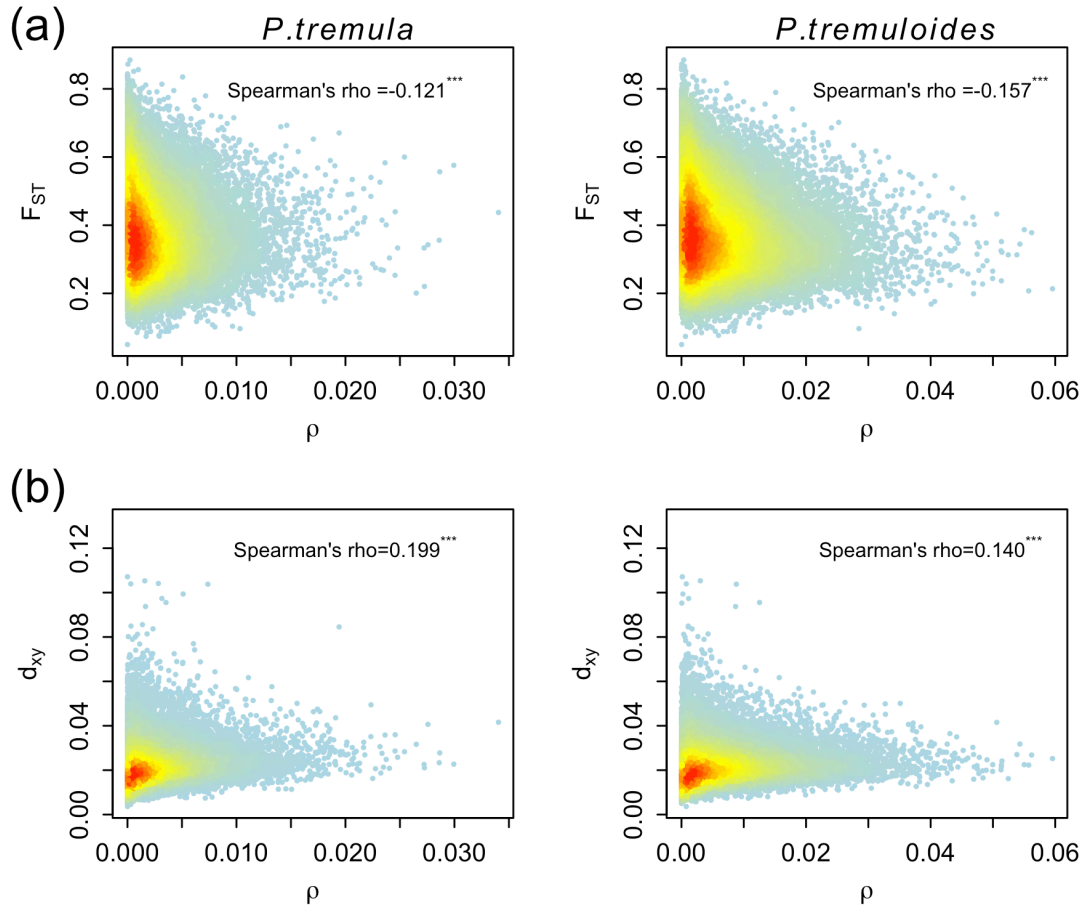

77

78

79 **Figure S11.** Relationships between population-scaled recombination rates ( $\rho$ ) and  $F_{ST}$   
 80 (a),  $d_{xy}$  (b) in both *P. tremula* (left panel) and *P. tremuloides* (right panel). Scatter  
 81 plots display genome-wide values of two variables in dots over 10 Kbp non-  
 82 overlapping windows. The red to yellow to blue gradient indicates decreased density  
 83 of observed events at a give location in the graph.

84

85

86

87

88

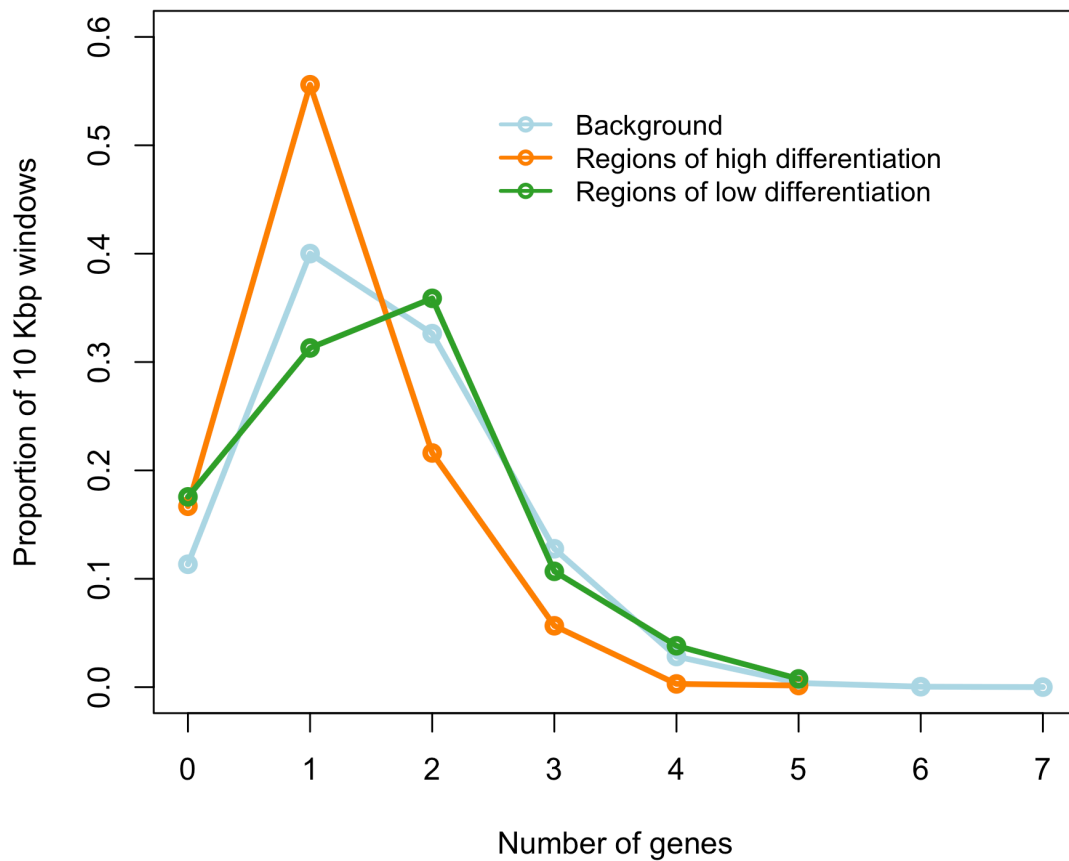

89

90 **Figure S12.** Comparison of gene density between regions displaying significantly  
 91 high (orange line) and low (green line) genetic differentiation with the genomic  
 92 background.

93

94

95

96

97



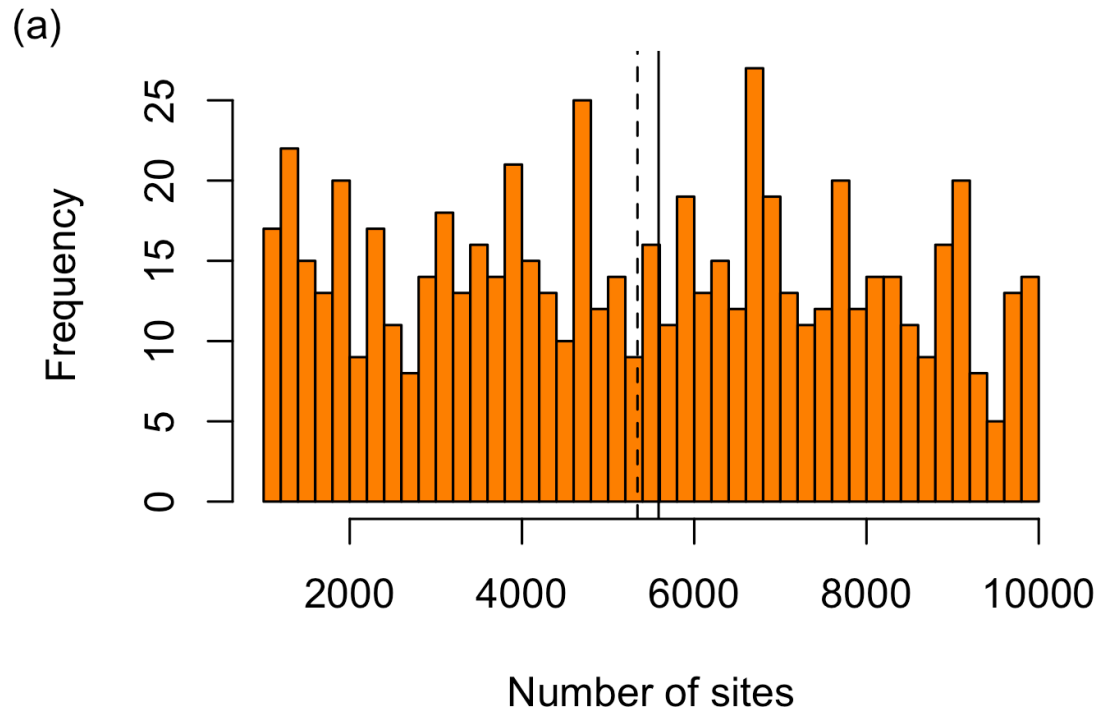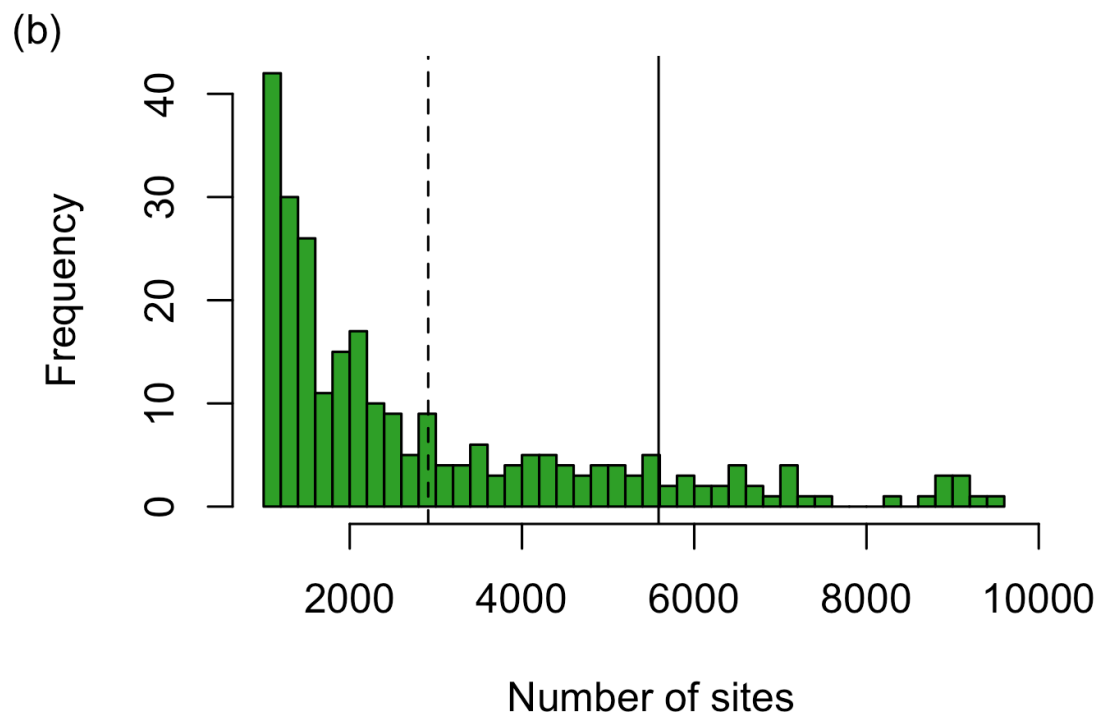

98

99 **Figure S13.** Frequency distribution of coverage breadth (the number of sites left after  
 100 a number of filtering steps listed in Methods and Materials) in outlier windows  
 101 displaying exceptionally high (a) and low (b) genetic differentiation between *P.*  
 102 *tremula* and *P. tremuloides*, with mean values of these regions being represented by  
 103 the vertical dashed line. Mean coverage breadth across the genome is represented by  
 104 the vertical solid line in both (a) and (b).
