# Supplementary material for: Variation in Linked Selection and Recombination Drive Genomic Divergence during Allopatric Speciation of European and American Aspens
Source: PubMed Central journal article supplement — Mol Biol Evol. 2016 Mar 15;33(7):1754–67. doi: 10.1093/molbev/msw051 (PMC4915356; doi:10.1093/molbev/msw051), 2016-03-15
Supplement: supp_msw051_Supplementary_Tables.pdf [file supp_msw051_Supplementary_Tables.pdf]

## Supplementary Tables

**Table S1. Summary statistics of Illumina re-sequencing data per sample**

| <b>SampleID</b>       | <b>Location</b> | <b>Latitude</b> | <b>Longitude</b> | <b>Mapping rate (%)</b> | <b>Mean Coverage</b> |
|-----------------------|-----------------|-----------------|------------------|-------------------------|----------------------|
| <i>P. tremula</i>     |                 |                 |                  |                         |                      |
| SwAsp001              | Simlang         | 56.6925         | 13.2147          | 91.34%                  | 20.50                |
| SwAsp009              | Simlang         | 56.7336         | 13.2517          | 90.52%                  | 23.70                |
| SwAsp011              | Ronneby         | 56.3478         | 15.025           | 90.06%                  | 48.58                |
| SwAsp014              | Ronneby         | 56.3081         | 15.1269          | 88.78%                  | 24.53                |
| SwAsp021              | Vargarda        | 57.9917         | 12.9119          | 89.54%                  | 18.50                |
| SwAsp025              | Vargarda        | 57.9869         | 12.9358          | 88.62%                  | 17.25                |
| SwAsp032              | Ydre            | 57.8492         | 15.3217          | 88.56%                  | 20.32                |
| SwAsp033              | Ydre            | 57.8281         | 15.3103          | 90.27%                  | 20.11                |
| SwAsp045              | Brunsborg       | 59.6425         | 12.9408          | 88.90%                  | 20.25                |
| SwAsp047              | Brunsborg       | 59.6308         | 12.9608          | 89.72%                  | 19.46                |
| SwAsp055              | Uppsala         | 59.8131         | 17.9817          | 88.66%                  | 22.25                |
| SwAsp057              | Uppsala         | 59.7761         | 17.9889          | 88.43%                  | 23.88                |
| SwAsp067              | Alvdalen        | 61.1978         | 13.8092          | 88.56%                  | 22.25                |
| SwAsp068              | Alvdalen        | 61.3017         | 13.7222          | 88.78%                  | 22.27                |
| SwAsp076              | Delsbo          | 61.7106         | 16.7311          | 90.34%                  | 36.74                |
| SwAsp078              | Delsbo          | 61.6925         | 16.67            | 88.88%                  | 21.01                |
| SwAsp087              | Dorotea         | 64.3406         | 16.3992          | 90.00%                  | 24.44                |
| SwAsp088              | Dorotea         | 64.3358         | 16.3736          | 89.94%                  | 23.22                |
| SwAsp096              | Umea            | 63.9781         | 20.7056          | 90.48%                  | 23.43                |
| SwAsp098              | Umea            | 63.8656         | 20.4986          | 90.27%                  | 24.60                |
| SwAsp103              | Arjeplog        | 66.0247         | 18.5742          | 91.27%                  | 22.23                |
| SwAsp110              | Arjeplog        | 66.2592         | 18               | 90.62%                  | 36.83                |
| SwAsp111              | Lulea           | 65.6703         | 21.8986          | 90.68%                  | 31.39                |
| SwAsp114              | Lulea           | 65.5544         | 22.3939          | 91.25%                  | 34.62                |
| Mean                  |                 |                 |                  | 89.77%                  | 25.10                |
| <i>P. tremuloides</i> |                 |                 |                  |                         |                      |
| Alb10-3               | Alberta         | 51.0718         | -115.0044        | 90.47%                  | 21.08                |
| Alb13-1               | Alberta         | 51.0479         | -115.0232        | 91.66%                  | 23.22                |
| Alb16-1               | Alberta         | 51.0838         | -115.3892        | 90.75%                  | 19.63                |
| Alb17-4               | Alberta         | 51.0809         | -115.3946        | 90.82%                  | 18.13                |
| Alb18-3               | Alberta         | 51.0686         | -115.3516        | 91.20%                  | 21.49                |
| Alb25-4               | Alberta         | 51.0524         | -114.9131        | 90.32%                  | 18.29                |
| Alb27-1               | Alberta         | 51.0405         | -114.8939        | 91.50%                  | 29.02                |
| Alb31-1               | Alberta         | 51.0435         | -114.8352        | 91.09%                  | 23.06                |
| Alb33-2               | Alberta         | 51.0431         | -114.7568        | 90.91%                  | 27.76                |
| Alb35-2               | Alberta         | 51.0234         | -115.0640        | 90.58%                  | 17.87                |
| Alb6-3                | Alberta         | 51.1324         | -115.0664        | 91.92%                  | 28.77                |

|           |                     |         |           |        |       |
|-----------|---------------------|---------|-----------|--------|-------|
| Albb15-3  | Alberta             | 51.0811 | -115.3767 | 91.79% | 22.14 |
| Dan1-1C13 | UW Arboreturn       | 43.0520 | -89.4242  | 91.08% | 24.12 |
| Dan2-1B7  | UW Arboreturn       | 43.0526 | -89.4253  | 90.95% | 30.61 |
| PG1-1B4   | Parfrey's Glenn     | 43.4249 | -89.6445  | 91.59% | 18.66 |
| PG2-1B9   | Parfrey's Glenn     | 43.4184 | -89.6417  | 91.65% | 24.14 |
| PG3-1B6   | Parfrey's Glenn     | 43.4198 | -89.6532  | 91.27% | 21.74 |
| PI3-1B3   | Pine Island area    | 43.5402 | -89.5666  | 90.99% | 23.13 |
| Sau1-1B10 | Boxter's Hollow     | 43.4036 | -89.8176  | 90.05% | 17.99 |
| Sau2-1B2  | Boxter's Hollow     | 43.4048 | -89.8243  | 90.79% | 11.79 |
| Sau3-1B13 | Boxter's Hollow     | 43.4053 | -89.8141  | 91.25% | 16.49 |
| Wau1-1B5  | Waushara<br>country | 44.1314 | -89.2082  | 91.01% | 36.65 |
| Mean      |                     |         |           | 91.07% | 22.53 |

---

**Table S2.** Tracy-Widom statistics for the first three eigenvalues in PCA analysis

| <b>Eigenvalues</b> | <b>Eigenvalues</b> | <b>Twstat</b> | <b>P-value</b> |
|--------------------|--------------------|---------------|----------------|
| 1                  | 21.40              | 15.374        | 2.506e-19      |
| 2                  | 2.09               | 3.290         | 9.651e-4       |
| 3                  | 1.98               | -3.62         | 0.980302       |

**Table S3.** Mean ( $\pm$ standard deviation) values of population genomic statistics ( $\Theta_\pi$ , Tajima's D, Fay&Wu's H,  $F_{ST}$  and  $d_{xy}$ ) comparisons between Alberta and Wisconsin population of *P. tremuloides* per chromosome.

|              | $\Theta_\pi$               |                            | Tajima's D                  |                             | Fay & Wu's H                |                             | $F_{ST}$                   | $d_{xy}$                   |
|--------------|----------------------------|----------------------------|-----------------------------|-----------------------------|-----------------------------|-----------------------------|----------------------------|----------------------------|
|              | Alberta                    | Wisconsin                  | Alberta                     | Wisconsin                   | Alberta                     | Wisconsin                   |                            |                            |
| <b>Chr01</b> | 0.0168<br>( $\pm 0.0080$ ) | 0.0165<br>( $\pm 0.0080$ ) | -0.9086<br>( $\pm 0.4671$ ) | -0.7125<br>( $\pm 0.4732$ ) | -0.3064<br>( $\pm 0.2545$ ) | -0.3003<br>( $\pm 0.2752$ ) | 0.0425<br>( $\pm 0.0236$ ) | 0.0172<br>( $\pm 0.0082$ ) |
| <b>Chr02</b> | 0.0149<br>( $\pm 0.0068$ ) | 0.0143<br>( $\pm 0.0068$ ) | -1.0459<br>( $\pm 0.4326$ ) | -0.8487<br>( $\pm 0.4353$ ) | -0.2822<br>( $\pm 0.2282$ ) | -0.2898<br>( $\pm 0.2649$ ) | 0.0643<br>( $\pm 0.0767$ ) | 0.0155<br>( $\pm 0.0074$ ) |
| <b>Chr03</b> | 0.0163<br>( $\pm 0.0084$ ) | 0.0158<br>( $\pm 0.0083$ ) | -0.9533<br>( $\pm 0.4599$ ) | -0.7716<br>( $\pm 0.4457$ ) | -0.2575<br>( $\pm 0.2463$ ) | -0.2539<br>( $\pm 0.2696$ ) | 0.0403<br>( $\pm 0.0216$ ) | 0.0165<br>( $\pm 0.0085$ ) |
| <b>Chr04</b> | 0.0166<br>( $\pm 0.0083$ ) | 0.0161<br>( $\pm 0.0083$ ) | -0.9466<br>( $\pm 0.4725$ ) | -0.7604<br>( $\pm 0.4599$ ) | -0.2817<br>( $\pm 0.2458$ ) | -0.2703<br>( $\pm 0.2495$ ) | 0.0416<br>( $\pm 0.0268$ ) | 0.0169<br>( $\pm 0.0084$ ) |
| <b>Chr05</b> | 0.0152<br>( $\pm 0.0072$ ) | 0.0148<br>( $\pm 0.0072$ ) | -0.9376<br>( $\pm 0.4464$ ) | -0.7292<br>( $\pm 0.4617$ ) | -0.2880<br>( $\pm 0.2405$ ) | -0.2831<br>( $\pm 0.2607$ ) | 0.0442<br>( $\pm 0.0268$ ) | 0.0155<br>( $\pm 0.0074$ ) |
| <b>Chr06</b> | 0.0155<br>( $\pm 0.0075$ ) | 0.0150<br>( $\pm 0.0074$ ) | -0.9574<br>( $\pm 0.4387$ ) | -0.7354<br>( $\pm 0.4552$ ) | -0.2948<br>( $\pm 0.2460$ ) | -0.2913<br>( $\pm 0.2574$ ) | 0.0453<br>( $\pm 0.0286$ ) | 0.0158<br>( $\pm 0.0077$ ) |
| <b>Chr07</b> | 0.0153<br>( $\pm 0.0076$ ) | 0.0150<br>( $\pm 0.0077$ ) | -0.9841<br>( $\pm 0.4379$ ) | -0.7912<br>( $\pm 0.4535$ ) | -0.3132<br>( $\pm 0.2700$ ) | -0.3042<br>( $\pm 0.2686$ ) | 0.0425<br>( $\pm 0.0225$ ) | 0.0156<br>( $\pm 0.0078$ ) |
| <b>Chr08</b> | 0.0141<br>( $\pm 0.0066$ ) | 0.0136<br>( $\pm 0.0066$ ) | -1.0507<br>( $\pm 0.4213$ ) | -0.8231<br>( $\pm 0.4283$ ) | -0.2421<br>( $\pm 0.2127$ ) | -0.2099<br>( $\pm 0.2241$ ) | 0.0496<br>( $\pm 0.0321$ ) | 0.0144<br>( $\pm 0.0068$ ) |
| <b>Chr09</b> | 0.0142<br>( $\pm 0.0059$ ) | 0.0138<br>( $\pm 0.0057$ ) | -1.0441<br>( $\pm 0.3974$ ) | -0.8018<br>( $\pm 0.4133$ ) | -0.2202<br>( $\pm 0.1959$ ) | -0.2144<br>( $\pm 0.2224$ ) | 0.0419<br>( $\pm 0.0221$ ) | 0.0144<br>( $\pm 0.0060$ ) |
| <b>Chr10</b> | 0.0141<br>( $\pm 0.0069$ ) | 0.0136<br>( $\pm 0.0069$ ) | -1.0274<br>( $\pm 0.4114$ ) | -0.8046<br>( $\pm 0.4256$ ) | -0.2473<br>( $\pm 0.2174$ ) | -0.2411<br>( $\pm 0.2419$ ) | 0.0415<br>( $\pm 0.0230$ ) | 0.0143<br>( $\pm 0.0070$ ) |
| <b>Chr11</b> | 0.0179<br>( $\pm 0.0081$ ) | 0.0175<br>( $\pm 0.0081$ ) | -0.9106<br>( $\pm 0.4568$ ) | -0.7215<br>( $\pm 0.4747$ ) | -0.2784<br>( $\pm 0.2335$ ) | -0.2732<br>( $\pm 0.2496$ ) | 0.0400<br>( $\pm 0.0207$ ) | 0.0182<br>( $\pm 0.0083$ ) |
| <b>Chr12</b> | 0.0173<br>( $\pm 0.0085$ ) | 0.0170<br>( $\pm 0.0085$ ) | -0.9653<br>( $\pm 0.4471$ ) | -0.7729<br>( $\pm 0.4571$ ) | -0.2653<br>( $\pm 0.2351$ ) | -0.2463<br>( $\pm 0.2462$ ) | 0.0396<br>( $\pm 0.0205$ ) | 0.0177<br>( $\pm 0.0088$ ) |
| <b>Chr13</b> | 0.0157<br>( $\pm 0.0082$ ) | 0.0153<br>( $\pm 0.0082$ ) | -0.9588<br>( $\pm 0.4870$ ) | -0.7818<br>( $\pm 0.4885$ ) | -0.2729<br>( $\pm 0.2554$ ) | -0.2646<br>( $\pm 0.2665$ ) | 0.0410<br>( $\pm 0.0231$ ) | 0.0160<br>( $\pm 0.0084$ ) |
| <b>Chr14</b> | 0.0161<br>( $\pm 0.0096$ ) | 0.0158<br>( $\pm 0.0095$ ) | -0.9975<br>( $\pm 0.4573$ ) | -0.8029<br>( $\pm 0.4545$ ) | -0.2678<br>( $\pm 0.2527$ ) | -0.2534<br>( $\pm 0.2648$ ) | 0.0402<br>( $\pm 0.0236$ ) | 0.0164<br>( $\pm 0.0097$ ) |
| <b>Chr15</b> | 0.0169<br>( $\pm 0.0083$ ) | 0.0165<br>( $\pm 0.0083$ ) | -0.9280<br>( $\pm 0.4514$ ) | -0.7261<br>( $\pm 0.4385$ ) | -0.2580<br>( $\pm 0.2459$ ) | -0.2523<br>( $\pm 0.2525$ ) | 0.0440<br>( $\pm 0.0274$ ) | 0.0173<br>( $\pm 0.0086$ ) |
| <b>Chr16</b> | 0.0176<br>( $\pm 0.0086$ ) | 0.0169<br>( $\pm 0.0083$ ) | -0.8526<br>( $\pm 0.4589$ ) | -0.6576<br>( $\pm 0.4619$ ) | -0.2846<br>( $\pm 0.2403$ ) | -0.2826<br>( $\pm 0.2719$ ) | 0.0444<br>( $\pm 0.0314$ ) | 0.0179<br>( $\pm 0.0088$ ) |
| <b>Chr17</b> | 0.0181<br>( $\pm 0.0094$ ) | 0.0181<br>( $\pm 0.0095$ ) | -0.7841<br>( $\pm 0.5009$ ) | -0.6659<br>( $\pm 0.5073$ ) | -0.2760<br>( $\pm 0.2742$ ) | -0.2673<br>( $\pm 0.2921$ ) | 0.0398<br>( $\pm 0.0226$ ) | 0.0186<br>( $\pm 0.0097$ ) |
| <b>Chr18</b> | 0.0167<br>( $\pm 0.0081$ ) | 0.0162<br>( $\pm 0.0079$ ) | -0.9224<br>( $\pm 0.4688$ ) | -0.6992<br>( $\pm 0.4718$ ) | -0.2829<br>( $\pm 0.2499$ ) | -0.2809<br>( $\pm 0.2669$ ) | 0.0427<br>( $\pm 0.0230$ ) | 0.0170<br>( $\pm 0.0083$ ) |
| <b>Chr19</b> | 0.0207<br>( $\pm 0.0104$ ) | 0.0202<br>( $\pm 0.0107$ ) | -0.6935<br>( $\pm 0.5026$ ) | -0.5612<br>( $\pm 0.4814$ ) | -0.2739<br>( $\pm 0.2598$ ) | -0.2813<br>( $\pm 0.2695$ ) | 0.0451<br>( $\pm 0.0356$ ) | 0.0212<br>( $\pm 0.0111$ ) |
| <b>Total</b> | 0.0161<br>( $\pm 0.0081$ ) | 0.0157<br>( $\pm 0.0080$ ) | -0.9494<br>( $\pm 0.4584$ ) | -0.7512<br>( $\pm 0.4604$ ) | -0.2768<br>( $\pm 0.2436$ ) | -0.2699<br>( $\pm 0.2610$ ) | 0.0443<br>( $\pm 0.0325$ ) | 0.0165<br>( $\pm 0.0083$ ) |

**Table S4.** Relative likelihood of the different models shown in Figure S2.

| <b>Model</b> | <b>Max(log<sub>10</sub>(Lhood<sub>i</sub>)<sup>a</sup></b> | <b>No. Of parameters(d)</b> | <b>AIC<sub>i</sub><sup>b</sup></b> | <b>Δ<sub>i</sub><sup>b</sup></b> | <b>Model normalized relative likelihood (w<sub>i</sub>)<sup>b</sup></b> |
|--------------|------------------------------------------------------------|-----------------------------|------------------------------------|----------------------------------|-------------------------------------------------------------------------|
| model1       | -101984901                                                 | 4                           | 469657833.5                        | 4348409.527                      | ~0                                                                      |
| model2       | -101543009                                                 | 6                           | 467622849.6                        | 2313425.664                      | ~0                                                                      |
| model3       | -101904750                                                 | 4                           | 469288724.5                        | 3979300.532                      | ~0                                                                      |
| model4       | -101040655                                                 | 6                           | 465309424.0                        | 0                                | 1                                                                       |
| model5       | -101921512                                                 | 4                           | 469365916.4                        | 4056492.395                      | ~0                                                                      |
| model6       | -101088118                                                 | 6                           | 465527999.2                        | 218575.193                       | ~0                                                                      |
| model7       | -101579670                                                 | 9                           | 467791685.8                        | 2482261.808                      | ~0                                                                      |
| model8       | -101522598                                                 | 9                           | 467528859.5                        | 2219435.535                      | ~0                                                                      |
| model9       | -101984994                                                 | 7                           | 469658267.8                        | 4348843.808                      | ~0                                                                      |
| model10      | -101601501                                                 | 9                           | 467892221.3                        | 2582797.278                      | ~0                                                                      |
| model11      | -101523956                                                 | 9                           | 467535113.3                        | 2225689.356                      | ~0                                                                      |
| model12      | -101990034                                                 | 7                           | 469681477.8                        | 4372053.866                      | ~0                                                                      |
| model13      | -101606614                                                 | 9                           | 467915767.5                        | 2606343.513                      | ~0                                                                      |
| model14      | -101607050                                                 | 9                           | 467917775.3                        | 2608351.367                      | ~0                                                                      |
| model15      | -101982056                                                 | 11                          | 469644745.8                        | 4335321.818                      | ~0                                                                      |
| model16      | -101685141                                                 | 13                          | 468277405.7                        | 2967981.712                      | ~0                                                                      |
| model17      | -101617365                                                 | 13                          | 467965285.7                        | 2655861.698                      | ~0                                                                      |
| model18      | -101686006                                                 | 13                          | 468281389.2                        | 2971965.185                      | ~0                                                                      |

<sup>a</sup>Based on the best likelihood among the 50 independent runs for each model (Figure S2).

<sup>b</sup>The calculation of AIC<sub>i</sub>, Δ<sub>i</sub> and w<sub>i</sub> are according to the methods shown in Excoffier *et al.* (2013).

**Table S5.** Demographic parameters used in *msms* simulations, with parameters corresponding to the models shown in Figure S5.

| Model               | N0    | N1     | N2     | N3     | T1   | T2   | m12 | m21 | m23 | m32 |
|---------------------|-------|--------|--------|--------|------|------|-----|-----|-----|-----|
| Model1 <sup>a</sup> | 56235 | 102814 | 309500 | -      | 0.51 | -    | 0.1 | 0.4 | -   | -   |
| Model2 <sup>b</sup> | 56235 | 102814 | 309500 | 309500 | 0.51 | 0.03 | 0.1 | 0.4 | 0   | 0   |
| Model3 <sup>b</sup> | 56235 | 102814 | 309500 | 309500 | 0.51 | 0.11 | 0.1 | 0.4 | 10  | 10  |

<sup>a</sup> All values in model 1 are based on the best-fitting model predicted by *fastsimcoal2*. Divergence times (T) are represented in units of 4N1 generations and gene flow are represented as 4Nm where N is the effective population size of the source (donor) species/populations and m is the per generation migration rate.

<sup>b</sup> N2, N3, T2, m23, m32 in model 2 and 3 correspond to the effective population sizes, divergence time and gene flow between subpopulation of Alberta and Wisconsin in *P. tremuloides*, respectively. All other parameters are the same as in model 1.

**Table S6.** Summary statistics comparing regions displaying extreme genetic differentiation with the rest of the genomic regions in both *P. tremula* and *P. tremuloides* (the mean±standard deviation values are shown).

| Parameters      | Species               | Regions displaying high differentiation | Regions displaying low differentiation | Background       |
|-----------------|-----------------------|-----------------------------------------|----------------------------------------|------------------|
| $\theta_s$      | <i>P. tremula</i>     | 0.0076(±0.0048) <sup>***</sup>          | 0.0356(±0.0166) <sup>***</sup>         | 0.0147(±0.0077)  |
|                 | <i>P. tremuloides</i> | 0.0094(±0.0054) <sup>***</sup>          | 0.0358(±0.0161) <sup>***</sup>         | 0.0160(±0.0078)  |
| Tajima's D      | <i>P. tremula</i>     | -0.9285(±0.5202) <sup>***</sup>         | -0.0660(±0.5327) <sup>***</sup>        | -0.2994(±0.5083) |
|                 | <i>P. tremuloides</i> | -1.6589(±0.4177) <sup>***</sup>         | -0.6047(±0.5534) <sup>***</sup>        | -1.1554(±0.4561) |
| Fay&Wu's H      | <i>P. tremula</i>     | -0.6800(±0.3886) <sup>***</sup>         | -0.1171(±0.2598) <sup>***</sup>        | -0.3984(±0.2793) |
|                 | <i>P. tremuloides</i> | -0.5154(±0.3024) <sup>***</sup>         | -0.1144(±0.2451) <sup>***</sup>        | -0.3222(±0.2196) |
| $r^2$           | <i>P. tremula</i>     | 0.2886(±0.1406) <sup>***</sup>          | 0.1985(±0.0964)                        | 0.2114(±0.1206)  |
|                 | <i>P. tremuloides</i> | 0.2481(±0.1372) <sup>***</sup>          | 0.1662(±0.0957) <sup>*</sup>           | 0.1577(±0.1110)  |
| $\rho/\theta_s$ | <i>P. tremula</i>     | 0.1627(±0.2634) <sup>***</sup>          | 0.1139(±0.1291) <sup>**</sup>          | 0.2395(±0.3533)  |
|                 | <i>P. tremuloides</i> | 0.2595(±0.3535) <sup>***</sup>          | 0.2087(±0.2388) <sup>**</sup>          | 0.5384(±0.5222)  |
| Fixed (%)       | <i>P. tremula</i>     | 0.0568(±0.0327) <sup>***</sup>          | ~0(±0.0000) <sup>***</sup>             | 0.0055(±0.0098)  |
|                 | <i>P. tremuloides</i> | 0.0431(±0.0290) <sup>***</sup>          | ~0(±0.0000) <sup>***</sup>             | 0.0035(±0.0073)  |
| Shared (%)      |                       | 0.0788(±0.0338) <sup>***</sup>          | 0.3468(±0.0937) <sup>***</sup>         | 0.1678(±0.0629)  |
| $F_{ST}$        |                       | 0.7402(±0.0438) <sup>***</sup>          | 0.1121(±0.0180) <sup>***</sup>         | 0.3804(±0.1216)  |
| $d_{xy}$        |                       | 0.0323(±0.0181) <sup>***</sup>          | 0.0401(±0.0180) <sup>***</sup>         | 0.0249(±0.0110)  |
| RND             |                       | 0.7313(±0.2013) <sup>***</sup>          | 0.6887(±0.1970) <sup>***</sup>         | 0.5516(±0.1431)  |

Asterisks designate significant differences between the regions displaying exceptionally genetic differentiation and the rest of genomic regions by Mann-Whitney U test (\*  $P$ -value < 0.05; \*\*  $P$ -value < 1e-4; \*\*\* $P$ -value <2.2e-16).

**Table S7.** List of the genes located in regions displaying significantly high genetic differentiation between *P. tremula* and *P. tremuloides*.

| <b>Poplar gene</b>                       | <b>Best Arabidopsis hit</b> | <b>Synonyms</b>           | <b>Annotated description</b>                                 |
|------------------------------------------|-----------------------------|---------------------------|--------------------------------------------------------------|
| Potri.001G003900<br>Potri.001G004000     | AT1G55350                   | ATDEK1,DEK1,EMB1275,EMB80 | calpain-type cysteine protease family                        |
| Potri.001G015400<br>Potri.001G025100     | AT3G45140                   | ATLOX2,LOX2               | lipoxygenase 2                                               |
| Potri.001G030700<br>Potri.001G030800     | AT1G29940                   | NRPA2                     | nuclear RNA polymerase A2                                    |
| Potri.001G030900<br>Potri.001G031000     | AT1G29940                   | NRPA2                     | nuclear RNA polymerase A2                                    |
| Potri.001G046500<br>Potri.001G049400     | AT2G32700                   | LUH                       | LEUNIG_homolog                                               |
| Potri.001G050100<br>Potri.001G062900     | AT2G02230                   | AtPP2-B1,PP2-B1           | phloem protein 2-B1                                          |
| Potri.001G078500<br><br>Potri.001G078600 | AT1G33410                   | ATNUP160,NUP160,SAR1      | SUPPRESSOR OF AUXIN RESISTANCE1                              |
| Potri.001G080900<br>Potri.001G083700     | AT2G43000                   | anac042,NAC042            | NAC domain containing protein 42                             |
| Potri.001G083800<br><br>Potri.001G083900 | AT2G46680                   | ATHB-7,ATHB7,HB-7         | homeobox 7                                                   |
| Potri.001G083900<br>Potri.001G098600     | AT2G46660                   | CYP78A6                   | cytochrome P450, family 78, subfamily A, polypeptide 6       |
| Potri.001G098700<br><br>Potri.001G102700 | AT4G11240                   | TOPP7                     | Calcineurin-like metallo-phosphoesterase superfamily protein |
| Potri.001G102800<br>Potri.001G102900     | AT1G12780                   | ATUGE1,UGE1               | UDP-D-glucose/UDP-D-galactose 4-epimerase 1                  |
| Potri.001G108200<br>Potri.001G108300     | AT1G63700                   | EMB71,MAPKKK4,YDA         | Protein kinase superfamily protein                           |
| Potri.001G124000<br>Potri.001G128200     | AT2G45760                   | BAL,BAP2                  | BON association protein 2                                    |
| Potri.001G155900<br>Potri.001G156000     | AT4G25230                   | RIN2                      | RPM1 interacting protein 2                                   |
| Potri.001G156100<br>Potri.001G161600     | AT1G53730                   | SRF6                      | STRUBBELIG-receptor family 6                                 |
| Potri.001G161700<br>Potri.001G165800     | AT1G53750                   | RPT1A                     | regulatory particle triple-A 1A                              |
| Potri.001G171000                         | AT5G13640                   | ATPDAT,PDAT,PDAT1         | phospholipid:diacylglycerol                                  |



|                  |           |                                     |                                                                                                       |
|------------------|-----------|-------------------------------------|-------------------------------------------------------------------------------------------------------|
| Potri.001G171100 | AT1G54170 | CID3                                | acyltransferase                                                                                       |
| Potri.001G171200 |           |                                     | CTC-interacting domain 3                                                                              |
| Potri.001G181100 |           |                                     |                                                                                                       |
| Potri.001G181600 | AT4G12560 | CPR30                               | F-box and associated interaction domains-containing protein                                           |
| Potri.001G182200 |           |                                     |                                                                                                       |
| Potri.001G186000 | AT1G79810 | ATPEX2,PEX2,TED3                    | Pex2/Pex12 N-terminal domain-containing protein / zinc finger (C3HC4-type RING finger) family protein |
| Potri.001G189700 | AT1G79750 | ATNADP-ME4,NADP-ME4                 | NADP-malic enzyme 4                                                                                   |
| Potri.001G189800 |           |                                     |                                                                                                       |
| Potri.001G191000 |           |                                     |                                                                                                       |
| Potri.001G191100 |           |                                     |                                                                                                       |
| Potri.001G191400 |           |                                     |                                                                                                       |
| Potri.001G191500 | AT3G16380 | PAB6                                | poly(A) binding protein 6                                                                             |
| Potri.001G191600 |           |                                     |                                                                                                       |
| Potri.001G194000 |           |                                     |                                                                                                       |
| Potri.001G194100 |           |                                     |                                                                                                       |
| Potri.001G194400 | AT1G17730 | CHMP1B,VPS46.1                      | vacuolar protein sorting 46.1                                                                         |
| Potri.001G195300 |           |                                     |                                                                                                       |
| Potri.001G195900 |           |                                     |                                                                                                       |
| Potri.001G196000 | AT1G51760 | IAR3,JR3                            | peptidase M20/M25/M40 family protein                                                                  |
| Potri.001G196100 |           |                                     |                                                                                                       |
| Potri.001G196500 |           |                                     |                                                                                                       |
| Potri.001G196600 |           |                                     |                                                                                                       |
| Potri.001G196700 |           |                                     |                                                                                                       |
| Potri.001G197000 | AT3G13890 | ATMYB26,MS35,MYB26                  | myb domain protein 26                                                                                 |
| Potri.001G205700 |           |                                     |                                                                                                       |
| Potri.001G205800 |           |                                     |                                                                                                       |
| Potri.001G206600 |           |                                     |                                                                                                       |
| Potri.001G206700 | AT4G33430 | ATBAK1,ATSERK3,BAK1,ELG,RKS10,SERK3 | BRI1-associated receptor kinase                                                                       |
| Potri.001G206800 | AT5G64570 | ATBXL4,XYL4                         | beta-D-xylosidase 4                                                                                   |
| Potri.001G229900 |           |                                     |                                                                                                       |
| Potri.001G230000 | AT2G31960 | ATGSL03,ATGSL3,GSL03                | glucan synthase-like 3                                                                                |
| Potri.001G239600 |           |                                     |                                                                                                       |
| Potri.001G244300 |           |                                     |                                                                                                       |
| Potri.001G244400 |           |                                     |                                                                                                       |
| Potri.001G260500 | AT5G13800 | CRN1,PPH                            | pheophytinase                                                                                         |
| Potri.001G260600 |           |                                     |                                                                                                       |
| Potri.001G260700 | AT3G51970 | ASAT1,ATASAT1,ATSAT1                | acyl-CoA sterol acyl transferase 1                                                                    |
| Potri.001G276900 |           |                                     |                                                                                                       |
| Potri.001G285800 |           |                                     |                                                                                                       |
| Potri.001G290500 |           |                                     |                                                                                                       |
| Potri.001G290600 | AT5G14930 | SAG101                              | senescence-associated gene 101                                                                        |

|                  |           |                              |                                                               |
|------------------|-----------|------------------------------|---------------------------------------------------------------|
| Potri.001G307700 |           |                              |                                                               |
| Potri.001G318800 |           |                              |                                                               |
| Potri.001G318900 |           |                              |                                                               |
| Potri.001G319000 |           |                              |                                                               |
| Potri.001G328400 | AT2G22540 | AGL22,SVP                    | K-box region and MADS-box transcription factor family protein |
| Potri.001G331900 |           |                              |                                                               |
| Potri.001G332000 |           |                              |                                                               |
| Potri.001G332100 | AT5G40870 | ATUK/UPRT1,UK/UPRT1,UKL1     | uridine kinase/uracil phosphoribosyltransferase 1             |
| Potri.001G347000 | AT5G15380 | DRM1                         | domains rearranged methylase 1                                |
| Potri.001G347100 |           |                              |                                                               |
| Potri.001G347200 | AT3G27785 | ATMYB118,MYB118,PGA37        | myb domain protein 118                                        |
| Potri.001G351400 | AT3G01480 | ATCYP38,CYP38                | cyclophilin 38                                                |
| Potri.001G351700 |           |                              |                                                               |
| Potri.001G351800 | AT4G18240 | ATSS4,SS4,SSIV               | starch synthase 4                                             |
| Potri.001G358400 | AT2G34640 | HMR,PTAC12                   | plastid transcriptionally active 12                           |
| Potri.001G359100 | AT3G20440 | BE1,EMB2729                  | Alpha amylase family protein                                  |
| Potri.001G359300 |           |                              |                                                               |
| Potri.001G359700 | AT5G55310 | TOP1,TOP1BETA                | DNA topoisomerase 1 beta                                      |
| Potri.001G359800 |           |                              |                                                               |
| Potri.001G359900 | AT5G55390 | EDM2                         | ENHANCED DOWNY MILDEW 2                                       |
| Potri.001G360100 | AT4G26700 | ATFIM1,FIM1                  | fimbrin 1                                                     |
| Potri.001G368000 | AT4G25434 | ATNUDT10,NUDT10              | nudix hydrolase homolog 10                                    |
| Potri.001G368100 | AT5G55760 | SRT1                         | sirtuin 1                                                     |
| Potri.001G378400 | AT1G78440 | ATGA2OX1,GA2OX1              | Arabidopsis thaliana gibberellin 2-oxidase 1                  |
| Potri.001G379800 | AT1G53590 | NTMC2T6.1,NTMC2TYPE6.1       | Calcium-dependent lipid-binding (CaLB domain) family protein  |
| Potri.001G396000 |           |                              |                                                               |
| Potri.001G402500 |           |                              |                                                               |
| Potri.001G402600 |           |                              |                                                               |
| Potri.001G406200 |           |                              |                                                               |
| Potri.001G415900 |           |                              |                                                               |
| Potri.001G416000 |           |                              |                                                               |
| Potri.001G416100 | AT5G54650 | ATFH5,Fh5                    | formin homology5                                              |
| Potri.001G449000 | AT4G10570 | UBP9                         | ubiquitin-specific protease 9                                 |
| Potri.001G449100 |           |                              |                                                               |
| Potri.001G457800 |           |                              |                                                               |
| Potri.001G466800 |           |                              |                                                               |
| Potri.002G000200 |           |                              |                                                               |
| Potri.002G013100 | AT1G62830 | ATLSD1,ATSWP1,LDL1,LSD1,SWP1 | LSD1-like 1                                                   |
| Potri.002G013200 | AT1G20450 | ERD10,LTI29,LTI45            | Dehydrin family protein                                       |
| Potri.002G024100 | AT1G75660 | AtXRN3,XRN3                  | 5'-3' exoribonuclease 3                                       |
| Potri.002G027200 | AT1G19910 | ATVHA-C2,AVA-2PE,AVA-P2      | ATPase, F0/V0 complex, subunit C protein                      |
| Potri.002G027300 |           |                              |                                                               |
| Potri.002G033100 |           |                              |                                                               |

|                  |           |                                              |                                                                                        |
|------------------|-----------|----------------------------------------------|----------------------------------------------------------------------------------------|
| Potri.002G035900 | AT1G03950 | VPS2.3                                       | vacuolar protein sorting-associated protein 2.3                                        |
| Potri.002G036000 | AT4G28540 | CKL6,PAPK1                                   | casein kinase I-like 6                                                                 |
| Potri.002G045900 | AT3G54610 | BGT,GCN5,HAC3,HAG01,HAG1,HAT1                | histone acetyltransferase of the GNAT family 1                                         |
| Potri.002G046000 |           |                                              |                                                                                        |
| Potri.002G053900 | AT2G31530 | EMB2289,SCY2                                 | SecY protein transport family protein                                                  |
| Potri.002G054000 | AT1G03190 | ATXPD,UVH6                                   | RAD3-like DNA-binding helicase protein                                                 |
| Potri.002G074400 | AT1G43890 | ATRAB-C1,ATRAB18,ATRABC1,RAB18,RAB18-1,RABC1 | RAB GTPASE HOMOLOG B18                                                                 |
| Potri.002G074500 |           |                                              |                                                                                        |
| Potri.002G076800 | AT5G54160 | ATOMT1,OMT1                                  | O-methyltransferase 1                                                                  |
| Potri.002G076900 |           |                                              |                                                                                        |
| Potri.002G079100 | AT1G77300 | ASHH2,CCR1,EFS,SDG8                          | histone methyltransferases(H3-K4 specific);histone methyltransferases(H3-K36 specific) |
| Potri.002G088700 |           |                                              |                                                                                        |
| Potri.002G088800 |           |                                              |                                                                                        |
| Potri.002G088900 | AT4G08500 | ARAKIN,ATMEKK1,MAPKKK8,MEK K1                | MAPK/ERK kinase kinase 1                                                               |
| Potri.002G104100 |           |                                              |                                                                                        |
| Potri.002G105100 |           |                                              |                                                                                        |
| Potri.002G107400 |           |                                              |                                                                                        |
| Potri.002G110700 | AT1G58250 | SAB                                          | Golgi-body localisation protein domain ;RNA pol II promoter Fmp27 protein domain       |
| Potri.002G111000 |           |                                              |                                                                                        |
| Potri.002G124100 | AT1G46480 | WOX4                                         | WUSCHEL related homeobox 4                                                             |
| Potri.002G124200 | AT2G23350 | PAB4,PABP4                                   | poly(A) binding protein 4                                                              |
| Potri.002G124500 |           |                                              |                                                                                        |
| Potri.002G124600 |           |                                              |                                                                                        |
| Potri.002G124700 | AT1G45976 | SBP1                                         | S-ribonuclease binding protein 1                                                       |
| Potri.002G126700 |           |                                              |                                                                                        |
| Potri.002G126800 |           |                                              |                                                                                        |
| Potri.002G126900 |           |                                              |                                                                                        |
| Potri.002G129200 | AT1G47720 | OSB1                                         | Primosome PriB/single-strand DNA-binding                                               |
| Potri.002G129300 | AT4G33300 | ADR1-L1                                      | ADR1-like 1                                                                            |
| Potri.002G143000 |           |                                              |                                                                                        |
| Potri.002G143200 |           |                                              |                                                                                        |
| Potri.002G150000 |           |                                              |                                                                                        |
| Potri.002G151400 | AT3G61130 | GAUT1,LGT1                                   | galacturonosyltransferase 1                                                            |
| Potri.002G151500 | AT2G45640 | ATSAP18,SAP18                                | SIN3 associated polypeptide P18                                                        |
| Potri.002G151600 |           |                                              |                                                                                        |
| Potri.002G152100 | AT2G42010 | PLDBETA,PLDBETA1                             | phospholipase D beta 1                                                                 |
| Potri.002G160500 | AT1G01650 | ATSPPL4,SPPL4                                | SIGNAL PEPTIDE PEPTIDASE-LIKE 4                                                        |
| Potri.002G160600 | AT3G61415 | ASK21,SK21                                   | SKP1-like 21                                                                           |
| Potri.002G164000 |           |                                              |                                                                                        |

|                  |           |                         |                                                  |
|------------------|-----------|-------------------------|--------------------------------------------------|
| Potri.002G164100 | AT5G12370 | SEC10                   | exocyst complex component sec10                  |
| Potri.002G175600 |           |                         |                                                  |
| Potri.002G176700 | AT2G46700 | ATCRK3,CRK3             | CDPK-related kinase 3                            |
| Potri.002G204200 |           |                         |                                                  |
| Potri.002G207200 | AT2G47940 | DEGP2                   | DEGP protease 2                                  |
| Potri.002G208700 |           |                         |                                                  |
| Potri.002G217000 |           |                         |                                                  |
| Potri.002G230000 | AT1G05200 | ATGLR3.4,GLR3.4,GLUR3   | glutamate receptor 3.4                           |
| Potri.002G230100 |           |                         |                                                  |
| Potri.002G235700 |           |                         |                                                  |
| Potri.002G237700 |           |                         |                                                  |
| Potri.002G237800 |           |                         |                                                  |
| Potri.002G245400 | AT3G25070 | RIN4                    | RPM1 interacting protein 4                       |
| Potri.002G245500 |           |                         |                                                  |
| Potri.002G246800 |           |                         |                                                  |
| Potri.002G246900 |           |                         |                                                  |
| Potri.002G257700 |           |                         |                                                  |
| Potri.002G257800 | AT4G28610 | AtPHR1,PHR1             | phosphate starvation response 1                  |
| Potri.002G260100 |           |                         |                                                  |
| Potri.002G260200 |           |                         |                                                  |
| Potri.003G005700 | AT1G33980 | ATUPF3,UPF3             | Smg-4/UPF3 family protein                        |
| Potri.003G005800 |           |                         |                                                  |
| Potri.003G009900 | AT4G25880 | APUM6,PUM6              | pumilio 6                                        |
| Potri.003G015400 | AT1G60940 | SNRK2-10,SNRK2.10,SRK2B | SNF1-related protein kinase 2.10                 |
| Potri.003G045700 | AT4G19210 | ATRLI2,RLI2             | RNAse I inhibitor protein 2                      |
| Potri.003G046800 | AT1G31770 | ABCG14                  | ATP-binding cassette 14                          |
| Potri.003G047600 |           |                         |                                                  |
| Potri.003G047700 | AT5G56600 | PFN3,PRF3               | profilin 3                                       |
| Potri.003G077500 |           |                         |                                                  |
| Potri.003G086400 | AT5G47010 | ATUPF1,LBA1,UPF1        | RNA helicase, putative                           |
| Potri.003G100000 | AT4G19020 | CMT2                    | chromomethylase 2                                |
| Potri.003G101000 |           |                         |                                                  |
| Potri.003G101100 |           |                         |                                                  |
| Potri.003G117500 |           |                         |                                                  |
| Potri.003G117600 |           |                         |                                                  |
| Potri.003G117700 | AT1G62960 | ACS10                   | ACC synthase 10                                  |
| Potri.003G117800 |           |                         |                                                  |
| Potri.003G123300 |           |                         |                                                  |
| Potri.003G123400 |           |                         |                                                  |
| Potri.003G132900 |           |                         |                                                  |
| Potri.003G134500 | AT4G24220 | AWI31,VEP1              | NAD(P)-binding Rossmann-fold superfamily protein |
| Potri.003G134600 |           |                         |                                                  |
| Potri.003G140500 |           |                         |                                                  |
| Potri.003G140600 |           |                         |                                                  |
| Potri.003G140700 |           |                         |                                                  |
| Potri.003G147700 |           |                         |                                                  |

|                  |           |                                                |                                                                                         |
|------------------|-----------|------------------------------------------------|-----------------------------------------------------------------------------------------|
| Potri.003G147800 |           |                                                |                                                                                         |
| Potri.003G147900 | AT1G64690 | BLT                                            | branchless trichome<br>K-box region and MADS-box<br>transcription factor family protein |
| Potri.003G169800 | AT5G10140 | AGL25,FLC,FLF                                  |                                                                                         |
| Potri.003G169900 | AT5G60910 | AGL8,FUL                                       | AGAMOUS-like 8                                                                          |
| Potri.003G170200 | AT5G60910 | AGL8,FUL                                       | AGAMOUS-like 8                                                                          |
| Potri.003G189500 |           |                                                |                                                                                         |
| Potri.003G214200 | AT5G13000 | ATGSL12,gs112                                  | glucan synthase-like 12                                                                 |
| Potri.003G215600 |           |                                                |                                                                                         |
| Potri.004G037900 | AT1G61120 | GES,TPS04,TPS4                                 | terpene synthase 04                                                                     |
| Potri.004G040900 |           |                                                |                                                                                         |
| Potri.004G047700 | AT1G28380 | NSL1                                           | MAC/Perforin domain-containing<br>protein                                               |
| Potri.004G051600 | AT2G33880 | HB-3,STIP,WOX9                                 | homeobox-3                                                                              |
| Potri.004G085400 | AT5G37600 | ATGLN1;1,ATGSR1,GLN1;1,GSR 1                   | glutamine synthase clone R1                                                             |
| Potri.004G092400 |           |                                                |                                                                                         |
| Potri.004G101200 | AT1G67140 | SWEETIE                                        | HEAT repeat-containing protein                                                          |
| Potri.004G101300 | AT1G67140 | SWEETIE                                        | HEAT repeat-containing protein                                                          |
| Potri.004G103900 | AT3G21630 | CERK1,LYSM RLK1                                | chitin elicitor receptor kinase 1                                                       |
| Potri.004G104000 | AT1G26110 | DCP5                                           | decapping 5                                                                             |
| Potri.004G104100 |           |                                                |                                                                                         |
| Potri.004G106600 | AT3G25180 | CYP82G1                                        | cytochrome P450, family 82,<br>subfamily G, polypeptide 1                               |
| Potri.004G106700 | AT5G15930 | PAM1                                           | plant adhesion molecule 1                                                               |
| Potri.004G121800 | AT5G39660 | CDF2                                           | cycling DOF factor 2<br>Domain of unknown function<br>(DUF298)                          |
| Potri.004G122100 | AT3G28970 | AAR3                                           |                                                                                         |
| Potri.004G124800 | AT5G15450 | APG6,CLPB-P,CLPB3                              | casein lytic proteinase B3                                                              |
| Potri.004G127400 |           |                                                |                                                                                         |
| Potri.004G129900 |           |                                                |                                                                                         |
| Potri.004G131400 |           |                                                |                                                                                         |
| Potri.004G133700 |           |                                                |                                                                                         |
| Potri.004G133800 |           |                                                |                                                                                         |
| Potri.004G143200 |           |                                                |                                                                                         |
| Potri.004G147800 | AT1G50030 | TOR                                            | target of rapamycin<br>Phosphatidylinositol 3- and 4-kinase<br>family protein           |
| Potri.004G152400 | AT1G49340 | ATPI4K ALPHA                                   |                                                                                         |
| Potri.004G155600 | AT1G19440 | KCS4                                           | 3-ketoacyl-CoA synthase 4                                                               |
| Potri.004G178000 |           |                                                |                                                                                         |
| Potri.004G178100 |           |                                                |                                                                                         |
| Potri.004G178200 |           |                                                |                                                                                         |
| Potri.004G185700 | AT1G08260 | ABO4,EMB142,EMB2284,EMB529,ES<br>D7,POL2A,TIL1 | DNA polymerase epsilon catalytic<br>subunit<br>C2H2 zinc-finger protein SERRATE<br>(SE) |
| Potri.004G196400 | AT2G27100 | SE                                             |                                                                                         |
| Potri.004G235200 |           |                                                |                                                                                         |
| Potri.004G235300 | AT4G19350 | EMB3006                                        | embryo defective 3006                                                                   |
| Potri.005G001200 |           |                                                |                                                                                         |
| Potri.005G001300 | AT3G62020 | GLP10                                          | germin-like protein 10                                                                  |

|                  |           |                               |                                                                                                                                                                      |
|------------------|-----------|-------------------------------|----------------------------------------------------------------------------------------------------------------------------------------------------------------------|
| Potri.005G001700 |           |                               |                                                                                                                                                                      |
| Potri.005G001800 | AT1G09530 | PAP3,PIF3,POC1                | phytochrome interacting factor 3                                                                                                                                     |
| Potri.005G005900 | AT1G09420 | G6PD4                         | glucose-6-phosphate dehydrogenase 4                                                                                                                                  |
| Potri.005G006000 |           |                               |                                                                                                                                                                      |
| Potri.005G006100 | AT1G09420 | G6PD4                         | glucose-6-phosphate dehydrogenase 4                                                                                                                                  |
| Potri.005G007000 |           |                               |                                                                                                                                                                      |
| Potri.005G049100 |           |                               |                                                                                                                                                                      |
| Potri.005G049200 |           |                               |                                                                                                                                                                      |
| Potri.005G059000 | AT5G64070 | PI-4KBETA1,PI4KBETA1          | phosphatidylinositol 4-OH kinase beta1                                                                                                                               |
| Potri.005G062700 | AT4G16990 | RLM3                          | disease resistance protein (TIR-NBS class), putative                                                                                                                 |
| Potri.005G065500 |           |                               |                                                                                                                                                                      |
| Potri.005G067500 |           |                               |                                                                                                                                                                      |
| Potri.005G067600 |           |                               |                                                                                                                                                                      |
| Potri.005G067700 | AT5G09260 | VPS20.2                       | vacuolar protein sorting-associated protein 20.2                                                                                                                     |
| Potri.005G067800 |           |                               |                                                                                                                                                                      |
| Potri.005G082400 | AT4G39620 | ATPPR5,EMB2453                | Tetratricopeptide repeat (TPR)-like superfamily protein                                                                                                              |
| Potri.005G082500 |           |                               |                                                                                                                                                                      |
| Potri.005G082600 |           |                               |                                                                                                                                                                      |
| Potri.005G096400 |           |                               |                                                                                                                                                                      |
| Potri.005G100700 |           |                               |                                                                                                                                                                      |
| Potri.005G100800 |           |                               |                                                                                                                                                                      |
| Potri.005G108800 |           |                               |                                                                                                                                                                      |
| Potri.005G114700 | AT2G17950 | PGA6,WUS,WUS1                 | Homeodomain-like superfamily protein                                                                                                                                 |
| Potri.005G128900 | AT4G36860 | DAR1                          | LIM domain-containing protein                                                                                                                                        |
| Potri.005G142700 | AT4G37270 | ATHMA1,HMA1                   | heavy metal atpase 1                                                                                                                                                 |
| Potri.005G142800 | AT4G37270 | ATHMA1,HMA1                   | heavy metal atpase 1                                                                                                                                                 |
| Potri.005G143000 |           |                               |                                                                                                                                                                      |
| Potri.005G143100 |           |                               |                                                                                                                                                                      |
| Potri.005G148000 | AT1G43130 | LCV2                          | like COV 2                                                                                                                                                           |
| Potri.005G152100 |           |                               |                                                                                                                                                                      |
| Potri.005G152200 |           |                               |                                                                                                                                                                      |
| Potri.005G152300 | AT5G49680 | KIP                           | Golgi-body localisation protein domain ;RNA pol II promoter Fmp27 protein domain<br>Golgi-body localisation protein domain ;RNA pol II promoter Fmp27 protein domain |
| Potri.005G152400 | AT1G58250 | SAB                           |                                                                                                                                                                      |
| Potri.005G152500 |           |                               |                                                                                                                                                                      |
| Potri.005G153100 |           |                               |                                                                                                                                                                      |
| Potri.005G157400 | AT4G24580 | REN1                          | Rho GTPase activation protein (RhoGAP) with PH domain                                                                                                                |
| Potri.005G157500 |           |                               |                                                                                                                                                                      |
| Potri.005G172100 |           |                               |                                                                                                                                                                      |
| Potri.005G172200 | AT4G08500 | ARAKIN,ATMEKK1,MAPKKK8,MEK K1 | MAPK/ERK kinase kinase 1                                                                                                                                             |
| Potri.005G182100 | AT1G77300 | ASHH2,CCR1,EFS,SDG8           | histone methyltransferases(H3-K4                                                                                                                                     |

|                  |           |                               |                                                                                                   |
|------------------|-----------|-------------------------------|---------------------------------------------------------------------------------------------------|
| Potri.005G193100 | AT1G43620 | TT15,UGT80B1                  | specific);histone methyltransferases(H3-K36 specific) UDP-Glycosyltransferase superfamily protein |
| Potri.005G203400 | AT1G16120 | WAKL1                         | wall associated kinase-like 1                                                                     |
| Potri.005G207700 | AT5G37020 | ARF8,ATARF8                   | auxin response factor 8<br>jasmonic acid carboxyl methyltransferase                               |
| Potri.005G230100 | AT1G19640 | JMT                           | LSD1-like 3                                                                                       |
| Potri.005G235400 | AT4G16310 | LDL3                          | basic pentacysteine 6                                                                             |
| Potri.005G235900 | AT5G42520 | ATBPC6,BBR/BPC6,BPC6          |                                                                                                   |
| Potri.005G236000 |           |                               |                                                                                                   |
| Potri.005G237100 |           |                               |                                                                                                   |
| Potri.005G242700 |           |                               |                                                                                                   |
| Potri.005G242800 |           |                               |                                                                                                   |
| Potri.005G259100 |           |                               |                                                                                                   |
| Potri.006G002600 | AT5G14420 | RGLG2                         | RING domain ligase2                                                                               |
| Potri.006G002700 |           |                               |                                                                                                   |
| Potri.006G002800 | AT5G56000 | AtHsp90.4,Hsp81.4             | HEAT SHOCK PROTEIN 81.4<br>UDP-Glycosyltransferase superfamily protein                            |
| Potri.006G023100 | AT1G22400 | ATUGT85A1,UGT85A1             | UDP-glucosyl transferase 85A4                                                                     |
| Potri.006G023200 | AT1G78270 | AtUGT85A4,UGT85A4             | jasmonate-zim-domain protein 8                                                                    |
| Potri.006G023300 | AT1G30135 | JAZ8,TIFY5A                   | Telomerase activating protein Est1                                                                |
| Potri.006G038500 | AT5G19400 | SMG7                          |                                                                                                   |
| Potri.006G038600 |           |                               |                                                                                                   |
| Potri.006G055300 | AT3G57660 | NRPA1                         | nuclear RNA polymerase A1                                                                         |
| Potri.006G070500 | AT3G10700 | GalAK                         | galacturonic acid kinase                                                                          |
| Potri.006G079800 |           |                               |                                                                                                   |
| Potri.006G079900 | AT5G58190 | ECT10                         | evolutionarily conserved C-terminal region 10                                                     |
| Potri.006G080000 |           |                               |                                                                                                   |
| Potri.006G097900 | AT4G00430 | PIP1;4,PIP1E,TMP-C            | plasma membrane intrinsic protein 1;4                                                             |
| Potri.006G105800 | AT2G38440 | ATSCAR2,DIS3,ITB1,SCAR2,WAVE4 | SCAR homolog 2                                                                                    |
| Potri.006G108200 | AT3G08760 | ATSIK                         | Protein kinase superfamily protein                                                                |
| Potri.006G109200 | AT5G04930 | ALA1                          | aminophospholipid ATPase 1<br>Malectin/receptor-like protein kinase family protein                |
| Potri.006G110000 | AT3G51550 | FER                           | heat shock transcription factor A3                                                                |
| Potri.006G115700 | AT5G03720 | AT-HSFA3,HSFA3                | Protein kinase superfamily protein                                                                |
| Potri.006G115800 | AT5G03730 | AtCTR1,CTR1,SIS1              |                                                                                                   |
| Potri.006G120200 |           |                               |                                                                                                   |
| Potri.006G120300 |           |                               |                                                                                                   |
| Potri.006G120400 |           |                               |                                                                                                   |
| Potri.006G120500 |           |                               |                                                                                                   |
| Potri.006G120600 | AT3G53150 | UGT73D1                       | UDP-glucosyl transferase 73D1                                                                     |
| Potri.006G120700 | AT2G26830 | emb1187                       | Protein kinase superfamily protein                                                                |
| Potri.006G130400 |           |                               |                                                                                                   |
| Potri.006G130500 |           |                               |                                                                                                   |
| Potri.006G135600 | AT5G58010 | LRL3                          | LJRHL1-like 3                                                                                     |
| Potri.006G135700 |           |                               |                                                                                                   |

|                  |           |                        |                                                                                                 |
|------------------|-----------|------------------------|-------------------------------------------------------------------------------------------------|
| Potri.006G137900 |           |                        |                                                                                                 |
| Potri.006G141300 | AT5G20570 | ATRBX1,HRT1,RBX1,ROC1  | RING-box 1                                                                                      |
| Potri.006G145100 | AT1G72830 | ATHAP2C,HAP2C,NF-YA3   | nuclear factor Y, subunit A3                                                                    |
| Potri.006G163400 |           |                        |                                                                                                 |
| Potri.006G163500 |           |                        |                                                                                                 |
| Potri.006G163600 | AT5G19690 | STT3A                  | staurosporin and temperature sensitive 3-like A                                                 |
| Potri.006G163700 | AT1G77180 | SKIP                   | chromatin protein family Galactose oxidase/kelch repeat superfamily protein                     |
| Potri.006G166300 | AT5G57360 | ADO1,FKL2,LKP1,ZTL     |                                                                                                 |
| Potri.006G167000 | AT4G30220 | RUXF                   | small nuclear ribonucleoprotein F                                                               |
| Potri.006G170700 |           |                        |                                                                                                 |
| Potri.006G174700 | AT4G30340 | ATDGK7,DGK7            | diacylglycerol kinase 7                                                                         |
| Potri.006G175500 | AT2G18700 | ATTPS11,ATTPSB,TPS11   | trehalose phosphatase/synthase 11                                                               |
| Potri.006G197000 | AT1G55310 | ATSCL33,SCL33,SR33     | SC35-like splicing factor 33                                                                    |
| Potri.006G197100 |           |                        |                                                                                                 |
| Potri.006G197200 |           |                        |                                                                                                 |
| Potri.006G197300 |           |                        |                                                                                                 |
| Potri.006G197400 |           |                        |                                                                                                 |
| Potri.006G197500 |           |                        |                                                                                                 |
| Potri.006G201100 | AT5G22030 | UBP8                   | ubiquitin-specific protease 8                                                                   |
| Potri.006G204600 |           |                        |                                                                                                 |
| Potri.006G208900 | AT3G11540 | SPY                    | Tetratricopeptide repeat (TPR)-like superfamily protein exocyst subunit exo70 family protein H4 |
| Potri.006G214300 | AT3G09520 | ATEXO70H4,EXO70H4      |                                                                                                 |
| Potri.006G216900 | AT3G43300 | ATMIN7,BEN1            | HOPM interactor 7                                                                               |
| Potri.006G222100 |           |                        |                                                                                                 |
| Potri.006G265100 |           |                        |                                                                                                 |
| Potri.006G275900 | AT1G22640 | ATMYB3,MYB3            | myb domain protein 3                                                                            |
| Potri.006G276000 |           |                        |                                                                                                 |
| Potri.006G276100 |           |                        |                                                                                                 |
| Potri.006G279900 |           |                        |                                                                                                 |
| Potri.006G280000 |           |                        |                                                                                                 |
| Potri.007G000200 | AT3G20000 | TOM40                  | translocase of the outer mitochondrial membrane 40                                              |
| Potri.007G000300 | AT3G20020 | ATPRMT6,PRMT6          | protein arginine methyltransferase 6                                                            |
| Potri.007G000700 |           |                        |                                                                                                 |
| Potri.007G001200 |           |                        |                                                                                                 |
| Potri.007G001300 |           |                        |                                                                                                 |
| Potri.007G002200 | AT2G07050 | CAS1                   | cycloartenol synthase 1                                                                         |
| Potri.007G002300 |           |                        |                                                                                                 |
| Potri.007G009600 | AT4G18240 | ATSS4,SS4,SSIV         | starch synthase 4                                                                               |
| Potri.007G009700 |           |                        |                                                                                                 |
| Potri.007G036800 | AT3G50440 | ATMES10,MES10          | methyl esterase 10                                                                              |
| Potri.007G045800 | AT2G23380 | CLF,ICU1,SDG1,SET1     | SET domain-containing protein                                                                   |
| Potri.007G056200 | AT4G38630 | ATMCB1,MBP1,MCB1,RPN10 | regulatory particle non-ATPase 10                                                               |
| Potri.007G059100 | AT2G17510 | EMB2763                | ribonuclease II family protein                                                                  |



|                  |           |                                    |                                                        |
|------------------|-----------|------------------------------------|--------------------------------------------------------|
| Potri.007G059200 |           |                                    |                                                        |
| Potri.007G059900 |           |                                    |                                                        |
| Potri.007G060000 |           |                                    |                                                        |
| Potri.007G060100 |           |                                    |                                                        |
| Potri.007G060300 | AT4G35790 | ATPLDDELTA,PLDDELTA                | phospholipase D delta                                  |
| Potri.007G060400 | AT5G66055 | AKRP,EMB16,EMB2036                 | ankyrin repeat protein                                 |
| Potri.007G060800 |           |                                    |                                                        |
| Potri.007G060900 | AT4G35830 | ACO1                               | aconitase 1                                            |
| Potri.007G061400 |           |                                    |                                                        |
| Potri.007G061500 | AT2G17800 | ARAC1,ATGP2,ATRAC1,ATROP3,RO<br>P3 | Arabidopsis RAC-like 1                                 |
| Potri.007G061600 | AT2G17790 | VPS35A,ZIP3                        | VPS35 homolog A                                        |
| Potri.007G061700 |           |                                    |                                                        |
| Potri.007G062700 |           |                                    |                                                        |
| Potri.007G063200 |           |                                    |                                                        |
| Potri.007G063800 |           |                                    |                                                        |
| Potri.007G063900 | AT2G26000 | BRIZ2                              | zinc finger (C3HC4-type RING<br>finger) family protein |
| Potri.007G064000 | AT4G35260 | IDH-I,IDH1                         | isocitrate dehydrogenase 1                             |
| Potri.007G066800 | AT3G12890 | ASML2                              | activator of spomin::LUC2                              |
| Potri.007G082700 |           |                                    |                                                        |
| Potri.007G086800 |           |                                    |                                                        |
| Potri.007G086900 |           |                                    |                                                        |
| Potri.007G107800 |           |                                    |                                                        |
| Potri.007G113300 | AT1G32750 | GTD1,HAC13,HAF01,HAF1,TAF1         | HAC13 protein (HAC13)                                  |
| Potri.007G115400 |           |                                    |                                                        |
| Potri.007G147000 |           |                                    |                                                        |
| Potri.007G147100 |           |                                    |                                                        |
| Potri.007G147200 | AT2G44150 | ASHH3,SDG7                         | histone-lysine N-methyltransferase<br>ASHH3            |
| Potri.008G002100 | AT5G23450 | ATLCBK1,LCBK1                      | long-chain base (LCB) kinase 1                         |
| Potri.008G008200 | AT3G21180 | ACA9,ATACA9                        | autoinhibited Ca(2+)-ATPase 9                          |
| Potri.008G008300 |           |                                    |                                                        |
| Potri.008G032800 | AT5G04290 | KTF1,SPT5L                         | kow domain-containing transcription<br>factor 1        |
| Potri.008G035600 | AT3G54860 | ATVPS33,VPS33                      | Sec1/munc18-like (SM) proteins<br>superfamily          |
| Potri.008G035700 | AT3G54850 | ATPUB14,PUB14                      | plant U-box 14                                         |
| Potri.008G045400 |           |                                    |                                                        |
| Potri.008G070300 | AT5G05560 | EMB2771                            | E3 ubiquitin ligase, putative                          |
| Potri.008G078600 |           |                                    |                                                        |
| Potri.008G078700 |           |                                    |                                                        |
| Potri.008G101200 | AT5G49930 | emb1441                            | zinc knuckle (CCHC-type) family<br>protein             |
| Potri.008G101300 | AT3G17205 | UPL6                               | ubiquitin protein ligase 6                             |
| Potri.008G107700 |           |                                    |                                                        |
| Potri.008G107800 | AT4G02080 | ASAR1,ATSAR2,ATSARA1C,SAR2         | secretion-associated RAS super<br>family 2             |
| Potri.008G107900 |           |                                    |                                                        |

|                  |           |                         |                                                                             |
|------------------|-----------|-------------------------|-----------------------------------------------------------------------------|
| Potri.008G109300 |           |                         |                                                                             |
| Potri.008G117000 |           |                         |                                                                             |
| Potri.008G133300 |           |                         |                                                                             |
| Potri.008G133400 | AT3G17860 | JAI3,JAZ3,TIFY6B        | jasmonate-zim-domain protein 3                                              |
| Potri.008G133600 |           |                         |                                                                             |
| Potri.008G133700 | AT2G01650 | PUX2                    | plant UBX domain-containing protein 2                                       |
| Potri.008G148000 | AT2G02800 | APK2B                   | protein kinase 2B                                                           |
| Potri.008G148100 | AT2G02860 | ATSUC3,ATSUT2,SUC3,SUT2 | sucrose transporter 2                                                       |
| Potri.008G151900 |           |                         |                                                                             |
| Potri.008G158800 | AT5G43810 | AGO10,PNH,ZLL           | Stabilizer of iron transporter SufD / Polynucleotidyl transferase           |
| Potri.008G163400 |           |                         |                                                                             |
| Potri.008G163500 |           |                         |                                                                             |
| Potri.008G163600 |           |                         |                                                                             |
| Potri.008G177100 |           |                         |                                                                             |
| Potri.008G202000 | AT3G63088 | DVL14,RTFL14            | ROTUNDIFOLIA like 14                                                        |
| Potri.008G202100 |           |                         |                                                                             |
| Potri.008G203300 | AT3G06100 | NIP7;1,NLM6,NLM8        | NOD26-like intrinsic protein 7;1                                            |
| Potri.008G205600 | AT3G06400 | CHR11                   | chromatin-remodeling protein 11                                             |
| Potri.008G205900 |           |                         |                                                                             |
| Potri.008G206000 | AT1G48270 | GCR1                    | G-protein-coupled receptor 1                                                |
| Potri.008G206100 |           |                         |                                                                             |
| Potri.008G206200 |           |                         |                                                                             |
| Potri.008G217300 | AT4G02570 | ATCUL1,AXR6,CUL1        | cullin 1                                                                    |
| Potri.008G217400 |           |                         |                                                                             |
| Potri.008G219100 |           |                         |                                                                             |
| Potri.009G007700 |           |                         |                                                                             |
| Potri.009G007800 | AT5G60790 | ATGCN1,GCN1             | ABC transporter family protein                                              |
| Potri.009G011000 |           |                         |                                                                             |
| Potri.009G015000 | AT5G60410 | ATSIZ1,SIZ1             | DNA-binding protein with MIZ/SP-RING zinc finger, PHD-finger and SAP domain |
| Potri.009G047700 | AT2G13360 | AGT,AGT1,SGAT           | alanine:glyoxylate aminotransferase                                         |
| Potri.009G047800 | AT2G13370 | CHR5                    | chromatin remodeling 5                                                      |
| Potri.009G054600 | AT4G34890 | ATXDH1,XDH1             | xanthine dehydrogenase 1                                                    |
| Potri.009G056900 |           |                         |                                                                             |
| Potri.009G057000 |           |                         |                                                                             |
| Potri.009G057100 |           |                         |                                                                             |
| Potri.009G078000 | AT5G37060 | ATCHX24,CHX24           | cation/H <sup>+</sup> exchanger 24                                          |
| Potri.009G078600 | AT2G14170 | ALDH6B2                 | aldehyde dehydrogenase 6B2                                                  |
| Potri.009G078700 | AT2G14170 | ALDH6B2                 | aldehyde dehydrogenase 6B2                                                  |
| Potri.009G078800 |           |                         |                                                                             |
| Potri.009G078900 |           |                         |                                                                             |
| Potri.009G094800 | AT1G49820 | ATMTK,MTK               | S-methyl-5-thioribose kinase                                                |
| Potri.009G094900 | AT2G15230 | ATLIP1,LIP1             | lipase 1                                                                    |
| Potri.009G095000 |           |                         |                                                                             |
| Potri.009G095100 | AT4G15480 | UGT84A1                 | UDP-Glycosyltransferase superfamily                                         |

|                  |           |                                         |                                                          |
|------------------|-----------|-----------------------------------------|----------------------------------------------------------|
| Potri.009G098300 | AT2G15480 | UGT73B5                                 | protein<br>UDP-glucosyl transferase 73B5                 |
| Potri.009G098400 | AT2G15480 | UGT73B5                                 | UDP-glucosyl transferase 73B5                            |
| Potri.009G098500 |           |                                         |                                                          |
| Potri.009G108200 | AT2G15890 | MEE14                                   | maternal effect embryo arrest 14                         |
| Potri.009G108300 |           |                                         |                                                          |
| Potri.009G108400 |           |                                         |                                                          |
| Potri.009G109400 | AT2G23460 | ATXLG1,XLG1                             | extra-large G-protein 1                                  |
| Potri.009G134200 | AT2G20990 | ATSYTA,NTMC2T1.1,NTMC2TYPE1.1,SYT1,SYTA | synaptotagmin A                                          |
| Potri.009G165600 | AT4G38360 | LAZ1                                    | Protein of unknown function (DUF300)                     |
| Potri.009G165700 | AT3G50360 | ATCEN2,CEN1,CEN2                        | centrin2                                                 |
| Potri.009G166900 |           |                                         |                                                          |
| Potri.009G167000 |           |                                         |                                                          |
| Potri.010G028200 |           |                                         |                                                          |
| Potri.010G028300 |           |                                         |                                                          |
| Potri.010G028400 |           |                                         |                                                          |
| Potri.010G044100 | AT1G10760 | GWD,GWD1,SEX1,SOP,SOP1                  | Pyruvate phosphate dikinase, PEP/pyruvate binding domain |
| Potri.010G078600 |           |                                         |                                                          |
| Potri.010G079300 | AT2G26640 | KCS11                                   | 3-ketoacyl-CoA synthase 11                               |
| Potri.010G081400 |           |                                         |                                                          |
| Potri.010G092900 | AT1G69830 | AMY3,ATAMY3                             | alpha-amylase-like 3                                     |
| Potri.010G104600 |           |                                         |                                                          |
| Potri.010G109700 |           |                                         |                                                          |
| Potri.010G109800 |           |                                         |                                                          |
| Potri.010G114000 | AT4G38620 | ATMYB4,MYB4                             | myb domain protein 4                                     |
| Potri.010G115400 |           |                                         |                                                          |
| Potri.010G115500 |           |                                         |                                                          |
| Potri.010G115700 | AT2G01270 | AtQSOX2,QSOX2                           | quiescin-sulfhydryl oxidase 2                            |
| Potri.010G122200 | AT3G18290 | BTS,EMB2454                             | zinc finger protein-related                              |
| Potri.010G133000 |           |                                         |                                                          |
| Potri.010G146800 |           |                                         |                                                          |
| Potri.010G152000 |           |                                         |                                                          |
| Potri.010G152100 |           |                                         |                                                          |
| Potri.010G152200 |           |                                         |                                                          |
| Potri.010G198300 |           |                                         |                                                          |
| Potri.010G198400 | AT3G55610 | P5CS2                                   | delta 1-pyrroline-5-carboxylate synthase 2               |
| Potri.010G198500 |           |                                         |                                                          |
| Potri.010G207100 |           |                                         |                                                          |
| Potri.010G207200 | AT2G28760 | UXS6                                    | UDP-XYL synthase 6                                       |
| Potri.010G210100 | AT3G55320 | PGP20                                   | P-glycoprotein 20                                        |
| Potri.010G210200 | AT3G55330 | PPL1                                    | PsbP-like protein 1                                      |
| Potri.010G211100 | AT3G07100 | ERMO2,SEC24A                            | Sec23/Sec24 protein transport family protein             |
| Potri.010G211200 |           |                                         |                                                          |

|                  |           |                             |                                                                                                          |
|------------------|-----------|-----------------------------|----------------------------------------------------------------------------------------------------------|
| Potri.010G211300 | AT2G39450 | ATMTP11,MTP11               | Cation efflux family protein<br>exocyst subunit exo70 family protein<br>H2                               |
| Potri.010G212400 | AT2G39380 | ATEXO70H2,EXO70H2           |                                                                                                          |
| Potri.010G215300 | AT2G37250 | ADK,ATPADK1                 | adenosine kinase                                                                                         |
| Potri.010G215400 |           |                             |                                                                                                          |
| Potri.010G215500 | AT3G55005 | TON1B                       | tonneau 1b (TON1b)<br>DNA-binding protein with MIZ/SP-<br>RING zinc finger, PHD-finger and<br>SAP domain |
| Potri.010G219600 | AT5G60410 | ATSIZ1,SIZ1                 |                                                                                                          |
| Potri.010G219700 |           |                             |                                                                                                          |
| Potri.010G219800 |           |                             |                                                                                                          |
| Potri.010G220000 |           |                             |                                                                                                          |
| Potri.010G228500 |           |                             |                                                                                                          |
| Potri.010G230400 |           |                             |                                                                                                          |
| Potri.010G230500 | AT5G04430 | BTR1,BTR1L,BTR1S            | binding to TOMV RNA 1L (long<br>form)                                                                    |
| Potri.010G234300 |           |                             |                                                                                                          |
| Potri.010G238400 |           |                             |                                                                                                          |
| Potri.010G238500 |           |                             |                                                                                                          |
| Potri.010G246400 |           |                             |                                                                                                          |
| Potri.010G246500 |           |                             |                                                                                                          |
| Potri.010G246600 | AT3G07040 | RPM1,RPS3                   | NB-ARC domain-containing disease<br>resistance protein                                                   |
| Potri.010G246700 |           |                             |                                                                                                          |
| Potri.010G246800 | AT5G17770 | ATCBR,CBR,CBR1              | NADH:cytochrome B5 reductase 1<br>ferredoxin/thioredoxin reductase<br>subunit A (variable subunit) 2     |
| Potri.010G255500 | AT5G08410 | FTRA2                       | long-chain base (LCB) kinase 1                                                                           |
| Potri.010G255600 | AT5G23450 | ATLCBK1,LCBK1               | calcium-dependent protein kinase 21                                                                      |
| Potri.011G003400 | AT4G04720 | CPK21                       | PCF11P-similar protein 4                                                                                 |
| Potri.011G024800 | AT4G04885 | PCFS4                       | SNF2 domain-containing protein /<br>helicase domain-containing protein /<br>zinc finger protein-related  |
| Potri.011G046400 | AT1G61140 | EDA16                       |                                                                                                          |
| Potri.011G046500 |           |                             |                                                                                                          |
| Potri.011G068900 |           |                             |                                                                                                          |
| Potri.011G069000 |           |                             |                                                                                                          |
| Potri.011G069100 |           |                             |                                                                                                          |
| Potri.011G077200 | AT4G18040 | AT.EIF4E1,CUM1,EIF4E,eIF4E1 | eukaryotic translation initiation factor<br>4E                                                           |
| Potri.011G090900 | AT1G30450 | ATCCC1,CCC1,HAP5            | cation-chloride co-transporter 1<br>multidrug resistance-associated<br>protein 1                         |
| Potri.011G091200 | AT1G30400 | ATABCC1,ATMRP1,EST1,MRP1    | calcineurin B-like 3                                                                                     |
| Potri.011G094900 | AT4G26570 | ATCBL3,CBL3                 | MAP kinase 19                                                                                            |
| Potri.011G102500 | AT3G14720 | ATMPK19,MPK19               |                                                                                                          |
| Potri.011G102600 |           |                             |                                                                                                          |
| Potri.011G123800 |           |                             |                                                                                                          |
| Potri.011G123900 | AT5G54440 | AfTRS130,CLUB               | CLUB                                                                                                     |
| Potri.011G144500 |           |                             |                                                                                                          |
| Potri.011G144700 |           |                             |                                                                                                          |
| Potri.011G158000 |           |                             |                                                                                                          |

|                  |           |                     |                                                             |
|------------------|-----------|---------------------|-------------------------------------------------------------|
| Potri.011G167700 | AT3G13330 | PA200               | proteasome activating protein 200                           |
| Potri.012G048400 |           |                     |                                                             |
| Potri.012G059000 |           |                     |                                                             |
| Potri.012G060100 |           |                     |                                                             |
| Potri.012G060700 |           |                     |                                                             |
| Potri.012G061000 | AT3G18480 | AtCASP,CASP         | CCAAT-displacement protein<br>alternatively spliced product |
| Potri.012G061100 |           |                     |                                                             |
| Potri.012G061900 |           |                     |                                                             |
| Potri.012G065600 | AT5G61150 | VIP4                | leo1-like family protein                                    |
| Potri.012G076800 |           |                     |                                                             |
| Potri.012G077900 | AT5G40200 | DegP9               | DegP protease 9                                             |
| Potri.013G001100 |           |                     |                                                             |
| Potri.013G001200 |           |                     |                                                             |
| Potri.013G001300 | AT1G09530 | PAP3,PIF3,POC1      | phytochrome interacting factor 3                            |
| Potri.013G035100 |           |                     |                                                             |
| Potri.013G035200 | AT3G04940 | ATCYSD1,CYSD1       | cysteine synthase D1                                        |
| Potri.013G039500 |           |                     |                                                             |
| Potri.013G039600 | AT5G49570 | AtPNG1,PNG1         | peptide-N-glycanase 1                                       |
| Potri.013G053500 | AT5G18280 | APY2,ATAPY2         | apyrase 2                                                   |
| Potri.013G053600 |           |                     |                                                             |
| Potri.013G068100 |           |                     |                                                             |
| Potri.013G076800 |           |                     |                                                             |
| Potri.013G076900 |           |                     |                                                             |
| Potri.013G078200 |           |                     |                                                             |
| Potri.013G081300 | AT1G15750 | TPL,WSIP1           | Transducin family protein / WD-40<br>repeat family protein  |
| Potri.013G081400 |           |                     |                                                             |
| Potri.013G081600 |           |                     |                                                             |
| Potri.013G081700 |           |                     |                                                             |
| Potri.013G083500 |           |                     |                                                             |
| Potri.013G083800 |           |                     |                                                             |
| Potri.013G084700 |           |                     |                                                             |
| Potri.013G084800 | AT3G03340 | UNE6                | LUC7 related protein                                        |
| Potri.013G086700 |           |                     |                                                             |
| Potri.013G087300 |           |                     |                                                             |
| Potri.013G087400 |           |                     |                                                             |
| Potri.013G087900 |           |                     |                                                             |
| Potri.013G088000 |           |                     |                                                             |
| Potri.013G088100 | AT1G31800 | CYP97A3,LUT5        | cytochrome P450, family 97,<br>subfamily A, polypeptide 3   |
| Potri.013G088200 | AT1G31800 | CYP97A3,LUT5        | cytochrome P450, family 97,<br>subfamily A, polypeptide 3   |
| Potri.013G089000 | AT3G14050 | AT-RSH2,ATRSH2,RSH2 | RELA/SPOT homolog 2                                         |
| Potri.013G099500 | AT4G19710 | AK-HSDH,AK-HSDH II  | aspartate kinase-homoserine<br>dehydrogenase ii             |
| Potri.013G108300 | AT4G23710 | VAG2,VATG2,VHA-G2   | vacuolar ATP synthase subunit G2                            |
| Potri.013G108400 |           |                     |                                                             |

|                  |           |                       |                                                          |
|------------------|-----------|-----------------------|----------------------------------------------------------|
| Potri.013G108500 | AT2G16920 | PFU2,UBC23            | ubiquitin-conjugating enzyme 23                          |
| Potri.013G108600 | AT1G72050 | TFIIIA                | transcription factor IIIA                                |
| Potri.013G108700 |           |                       |                                                          |
| Potri.013G108800 |           |                       |                                                          |
| Potri.013G114100 |           |                       |                                                          |
| Potri.013G115700 |           |                       |                                                          |
| Potri.013G127000 |           |                       |                                                          |
| Potri.013G129400 |           |                       |                                                          |
| Potri.013G129500 |           |                       |                                                          |
| Potri.013G159500 |           |                       |                                                          |
| Potri.013G159600 | AT1G26910 | RPL10B                | Ribosomal protein L16p/L10e family protein               |
| Potri.013G161100 | AT5G58240 | FHIT                  | FRAGILE HISTIDINE TRIAD                                  |
| Potri.013G161200 |           |                       |                                                          |
| Potri.014G014700 | AT1G10130 | ATECA3,ECA3           | endoplasmic reticulum-type calcium-transporting ATPase 3 |
| Potri.014G014800 |           |                       |                                                          |
| Potri.014G025300 | AT1G46480 | WOX4                  | WUSCHEL related homeobox 4                               |
| Potri.014G025400 | AT1G49760 | PAB8,PABP8            | poly(A) binding protein 8                                |
| Potri.014G025500 |           |                       |                                                          |
| Potri.014G028500 | AT5G11210 | ATGLR2.5,GLR2.5       | glutamate receptor 2.5                                   |
| Potri.014G028600 |           |                       |                                                          |
| Potri.014G028700 |           |                       |                                                          |
| Potri.014G028800 | AT2G29120 | ATGLR2.7,GLR2.7       | glutamate receptor 2.7                                   |
| Potri.014G028900 |           |                       |                                                          |
| Potri.014G029000 | AT5G42900 | COR27                 | cold regulated gene 27                                   |
| Potri.014G109900 |           |                       |                                                          |
| Potri.014G117800 | AT2G47230 | ATDUF6,DUF6           | DOMAIN OF UNKNOWN FUNCTION 724 6                         |
| Potri.014G128200 | AT4G02390 | APP,ATPARP1,PARP1,PP  | poly(ADP-ribose) polymerase                              |
| Potri.014G136000 |           |                       |                                                          |
| Potri.014G141800 | AT2G42810 | PAPP5,PP5,PP5.2       | protein phosphatase 5.2                                  |
| Potri.014G167800 | AT4G14540 | NF-YB3                | nuclear factor Y, subunit B3                             |
| Potri.014G171800 | AT5G48300 | ADG1,APS1             | ADP glucose pyrophosphorylase 1                          |
| Potri.014G185300 |           |                       |                                                          |
| Potri.014G189500 |           |                       |                                                          |
| Potri.014G189900 |           |                       |                                                          |
| Potri.014G194300 | AT2G20300 | ALE2                  | Protein kinase superfamily protein                       |
| Potri.014G195100 |           |                       |                                                          |
| Potri.014G195200 |           |                       |                                                          |
| Potri.014G195300 |           |                       |                                                          |
| Potri.014G195700 |           |                       |                                                          |
| Potri.014G195800 | AT5G44070 | ARA8,ATPCS1,CAD1,PCS1 | phytochelatin synthase 1 (PCS1)                          |
| Potri.014G196700 |           |                       |                                                          |
| Potri.014G196800 |           |                       |                                                          |
| Potri.015G032300 |           |                       |                                                          |
| Potri.015G032400 |           |                       |                                                          |

|                  |           |                                                   |                                                                                                    |
|------------------|-----------|---------------------------------------------------|----------------------------------------------------------------------------------------------------|
| Potri.015G032500 |           |                                                   |                                                                                                    |
| Potri.015G035600 |           |                                                   |                                                                                                    |
| Potri.015G048700 | AT2G03800 | GEK1                                              | D-aminoacyl-tRNA deacylases                                                                        |
| Potri.015G049700 |           |                                                   |                                                                                                    |
| Potri.015G049800 |           |                                                   |                                                                                                    |
| Potri.015G050800 | AT1G73960 | TAF2                                              | TBP-associated factor 2                                                                            |
| Potri.015G051000 |           |                                                   |                                                                                                    |
| Potri.015G051200 |           |                                                   |                                                                                                    |
| Potri.015G051800 |           |                                                   |                                                                                                    |
| Potri.015G051900 |           |                                                   |                                                                                                    |
| Potri.015G052100 |           |                                                   |                                                                                                    |
| Potri.015G052200 | AT5G23060 | CaS                                               | calcium sensing receptor                                                                           |
| Potri.015G052400 |           |                                                   |                                                                                                    |
| Potri.015G052500 |           |                                                   |                                                                                                    |
| Potri.015G052600 |           |                                                   |                                                                                                    |
| Potri.015G053300 |           |                                                   |                                                                                                    |
| Potri.015G055400 |           |                                                   |                                                                                                    |
| Potri.015G062100 | AT5G61410 | EMB2728,RPE                                       | D-ribulose-5-phosphate-3-epimerase<br>light-harvesting chlorophyll-protein<br>complex I subunit A4 |
| Potri.015G062200 | AT3G47470 | CAB4,LHCA4                                        |                                                                                                    |
| Potri.015G075800 | AT5G14750 | ATMYB66,MYB66,WER,WER1                            | myb domain protein 66                                                                              |
| Potri.015G079800 | AT4G24680 | MOS1                                              | modifier of snc1                                                                                   |
| Potri.015G104500 | AT3G05020 | ACP,ACP1                                          | acyl carrier protein 1                                                                             |
| Potri.015G104600 |           |                                                   |                                                                                                    |
| Potri.015G106400 |           |                                                   |                                                                                                    |
| Potri.016G029200 | AT1G65440 | GTB1                                              | global transcription factor group B1                                                               |
| Potri.016G069100 | AT3G05680 | EMB2016                                           | embryo defective 2016                                                                              |
| Potri.016G079200 |           |                                                   |                                                                                                    |
| Potri.016G094300 | AT1G07570 | APK1,APK1A                                        | Protein kinase superfamily protein                                                                 |
| Potri.016G094700 |           |                                                   |                                                                                                    |
| Potri.016G094800 | AT3G47620 | AtTCP14,TCP14                                     | TEOSINTE BRANCHED, cycloidea<br>and PCF (TCP) 14                                                   |
| Potri.016G095400 |           |                                                   |                                                                                                    |
| Potri.016G095500 |           |                                                   |                                                                                                    |
| Potri.016G095700 | AT5G03730 | AtCTR1,CTR1,SIS1                                  | Protein kinase superfamily protein                                                                 |
| Potri.016G095800 | AT5G03730 | AtCTR1,CTR1,SIS1                                  | Protein kinase superfamily protein                                                                 |
| Potri.016G095900 | AT5G03770 | KDTA                                              | KDO transferase A                                                                                  |
| Potri.016G096300 |           |                                                   |                                                                                                    |
| Potri.016G096700 |           |                                                   |                                                                                                    |
| Potri.016G096800 |           |                                                   |                                                                                                    |
| Potri.016G096900 |           |                                                   |                                                                                                    |
| Potri.016G097000 |           |                                                   |                                                                                                    |
| Potri.016G097300 |           |                                                   |                                                                                                    |
| Potri.016G097800 | AT5G03530 | ATRAB,ATRAB<br>ALPHA,ATRAB18B,ATRABC2A,RAB<br>C2A | RAB GTPase homolog C2A                                                                             |
| Potri.016G097900 |           |                                                   |                                                                                                    |
| Potri.016G098000 |           |                                                   |                                                                                                    |

|                  |           |                                    |                                                               |
|------------------|-----------|------------------------------------|---------------------------------------------------------------|
| Potri.016G098100 |           |                                    |                                                               |
| Potri.016G101400 | AT2G37740 | ATZFP10,ZFP10                      | zinc-finger protein 10                                        |
| Potri.016G103300 |           |                                    |                                                               |
| Potri.016G132000 | AT3G08850 | ATRAPTOR1B,RAPTOR1,RAPTOR1B        | HEAT repeat ;WD domain, G-beta repeat protein protein         |
| Potri.016G141500 |           |                                    |                                                               |
| Potri.016G141600 |           |                                    |                                                               |
| Potri.016G141700 |           |                                    |                                                               |
| Potri.016G142400 | AT2G48110 | MED33B,REF4                        | reduced epidermal fluorescence 4                              |
| Potri.016G142500 | AT3G23590 | MED33A,RFR1                        | REF4-related 1                                                |
| Potri.017G039100 |           |                                    |                                                               |
| Potri.017G041300 |           |                                    |                                                               |
| Potri.017G041700 |           |                                    |                                                               |
| Potri.017G042100 |           |                                    |                                                               |
| Potri.017G044100 |           |                                    |                                                               |
| Potri.017G044200 | AT2G22540 | AGL22,SVP                          | K-box region and MADS-box transcription factor family protein |
| Potri.017G044600 |           |                                    |                                                               |
| Potri.017G051300 | AT1G17840 | ABCG11,ATWBC11,COF1,DSO,WBC11      | white-brown complex homolog protein 11                        |
| Potri.017G073100 | AT3G02020 | AK3                                | aspartate kinase 3                                            |
| Potri.017G073200 | AT5G40280 | ATFTB,ERA1,WIG                     | Prenyltransferase family protein                              |
| Potri.017G087900 | AT3G01090 | AKIN10,KIN10,SNRK1.1               | SNF1 kinase homolog 10                                        |
| Potri.017G092600 | AT5G15540 | ATSCC2,EMB2773,SCC2                | PHD finger family protein                                     |
| Potri.017G101100 | AT3G02260 | ASA1,BIG,CRM1,DOC1,LPR1,TIR3,UMB1  | auxin transport protein (BIG)                                 |
| Potri.017G112200 |           |                                    |                                                               |
| Potri.017G128300 | AT3G03380 | DegP7                              | DegP protease 7                                               |
| Potri.017G141000 | AT5G37020 | ARF8,ATARF8                        | auxin response factor 8                                       |
| Potri.017G141100 | AT1G17880 | ATBTF3,BTF3                        | basic transcription factor 3                                  |
| Potri.017G141200 |           |                                    |                                                               |
| Potri.017G142000 |           |                                    |                                                               |
| Potri.017G142100 |           |                                    |                                                               |
| Potri.017G142200 |           |                                    |                                                               |
| Potri.018G019100 | AT3G23780 | DMS2,DRD2,NRPD2,NRPD2A,NRPE2       | nuclear RNA polymerase D2A                                    |
| Potri.018G047700 | AT2G26280 | CID7                               | CTC-interacting domain 7                                      |
| Potri.018G047800 | AT5G21930 | ATHMA8,HMA8,PAA2                   | P-type ATPase of Arabidopsis 2                                |
| Potri.018G047900 | AT2G26330 | ER,QRP1                            | Leucine-rich receptor-like protein kinase family protein      |
| Potri.018G059400 | AT4G32940 | GAMMA-VPE,GAMMAVPE                 | gamma vacuolar processing enzyme                              |
| Potri.018G060000 |           |                                    |                                                               |
| Potri.018G061800 |           |                                    |                                                               |
| Potri.018G066000 |           |                                    |                                                               |
| Potri.018G066100 | AT2G19450 | ABX45,AS11,ATDGAT,DGAT1,RDS1, TAG1 | membrane bound O-acyl transferase (MBOAT) family protein      |
| Potri.018G072600 | AT2G26890 | GRV2,KAM2                          | DNAJ heat shock N-terminal domain-containing protein          |
| Potri.018G089700 | AT4G30160 | ATVLN4,VLN4                        | villin 4                                                      |
| Potri.018G139900 | AT5G57110 | ACA8,AT-ACA8                       | autoinhibited Ca <sup>2+</sup> -ATPase, isoform 8             |



|                  |           |                                           |                                                         |
|------------------|-----------|-------------------------------------------|---------------------------------------------------------|
| Potri.018G140200 |           |                                           |                                                         |
| Potri.018G140300 |           |                                           |                                                         |
| Potri.018G141100 | AT1G51590 | MANIB,MNS1                                | alpha-mannosidase 1                                     |
| Potri.018G141200 |           |                                           |                                                         |
| Potri.018G142300 |           |                                           |                                                         |
| Potri.018G142400 | AT4G29940 | PRHA                                      | pathogenesis related homeodomain protein A              |
| Potri.019G047300 | AT5G16750 | TOZ                                       | Transducin family protein / WD-40 repeat family protein |
| Potri.019G078300 | AT5G47850 | CCR4                                      | CRINKLY4 related 4                                      |
| Potri.019G080300 | AT1G22620 | ATSAC1                                    | Phosphoinositide phosphatase family protein             |
| Potri.019G129700 |           |                                           |                                                         |
| Potri.019G129800 |           |                                           |                                                         |
| Potri.019G129900 | AT5G66750 | ATDDM1,CHA1,CHR01,CHR1,DDM1,<br>SOM1,SOM4 | chromatin remodeling 1                                  |

---

**Table S8.** List of the genes located in regions displaying significantly low genetic differentiation between *P. tremula* and *P. tremuloides*.

| <b>Poplar gene</b> | <b>Best Arabidopsis hit</b> | <b>Synonyms</b>   | <b>Annotated description</b>                  |
|--------------------|-----------------------------|-------------------|-----------------------------------------------|
| Potri.001G017800   |                             |                   |                                               |
| Potri.001G017900   |                             |                   |                                               |
| Potri.001G043500   |                             |                   |                                               |
| Potri.001G043600   | AT5G15350                   | AtENODL17,ENODL17 | early nodulin-like protein 17                 |
| Potri.001G043700   |                             |                   |                                               |
| Potri.001G061400   | AT5G50850                   | MAB1              | Transketolase family protein                  |
| Potri.001G064800   | AT1G74170                   | AtRLP13,RLP13     | receptor like protein 13                      |
| Potri.001G064900   | AT1G74190                   | AtRLP15,RLP15     | receptor like protein 15                      |
| Potri.001G159200   |                             |                   |                                               |
| Potri.001G212000   | AT1G22020                   | SHM6              | serine hydroxymethyltransferase 6             |
| Potri.001G276800   |                             |                   |                                               |
| Potri.001G293600   |                             |                   |                                               |
| Potri.001G394000   |                             |                   |                                               |
| Potri.001G394100   |                             |                   |                                               |
| Potri.001G398900   | AT5G53860                   | emb2737,EMB64     | embryo defective 2737                         |
| Potri.001G399000   |                             |                   |                                               |
| Potri.001G424600   | AT4G27040                   | VPS22             | EAP30/Vps36 family protein                    |
| Potri.001G424700   | AT4G27030                   | FAD4,FADA         | fatty acid desaturase A                       |
| Potri.001G424800   |                             |                   |                                               |
| Potri.001G432100   |                             |                   |                                               |
| Potri.001G432200   |                             |                   |                                               |
| Potri.001G432300   |                             |                   |                                               |
| Potri.001G440800   |                             |                   |                                               |
| Potri.001G440900   |                             |                   |                                               |
| Potri.001G441000   |                             |                   |                                               |
| Potri.001G441100   |                             |                   |                                               |
| Potri.001G445600   |                             |                   |                                               |
| Potri.001G445900   |                             |                   |                                               |
| Potri.002G116500   |                             |                   |                                               |
| Potri.002G116600   |                             |                   |                                               |
| Potri.002G116700   |                             |                   |                                               |
| Potri.002G116800   | AT1G02000                   | GAE2              | UDP-D-glucuronate 4-epimerase 2               |
| Potri.002G117000   | AT2G45330                   | emb1067           | RNA 2'-phosphotransferase, Tpt1 / KptA family |
| Potri.002G119800   |                             |                   |                                               |
| Potri.002G119900   | AT5G43130                   | TAF4,TAF4B        | TBP-associated factor 4                       |

|                  |           |            |                                                        |
|------------------|-----------|------------|--------------------------------------------------------|
| Potri.002G146600 |           |            |                                                        |
| Potri.002G146700 |           |            |                                                        |
| Potri.002G215100 | AT2G30950 | FTSH2,VAR2 | FtsH extracellular protease family                     |
| Potri.003G000200 |           |            |                                                        |
| Potri.003G000300 |           |            |                                                        |
| Potri.003G027300 |           |            |                                                        |
| Potri.003G061200 |           |            |                                                        |
| Potri.003G181600 |           |            |                                                        |
| Potri.003G181700 |           |            |                                                        |
| Potri.003G198700 |           |            |                                                        |
| Potri.003G198800 |           |            |                                                        |
| Potri.003G199100 |           |            |                                                        |
| Potri.003G199600 |           |            |                                                        |
| Potri.003G199700 |           |            |                                                        |
| Potri.003G200100 |           |            |                                                        |
| Potri.003G200200 |           |            |                                                        |
| Potri.003G200400 | AT3G54480 | SKIP5,SKP5 | SKP1/ASK-interacting protein 5                         |
| Potri.003G200500 |           |            |                                                        |
| Potri.003G201700 | AT1G29050 | TBL38      | TRICHOME<br>BIREFRINGENCE-LIKE 38                      |
| Potri.003G201800 |           |            |                                                        |
| Potri.003G201900 |           |            |                                                        |
| Potri.003G202000 |           |            |                                                        |
| Potri.003G202100 | AT1G50420 | SCL-3,SCL3 | scarecrow-like 3                                       |
| Potri.003G207600 |           |            |                                                        |
| Potri.003G207700 |           |            |                                                        |
| Potri.003G207800 |           |            |                                                        |
| Potri.003G209700 |           |            |                                                        |
| Potri.003G209800 |           |            |                                                        |
| Potri.003G209900 |           |            |                                                        |
| Potri.003G210000 |           |            |                                                        |
| Potri.003G210100 |           |            |                                                        |
| Potri.003G210200 |           |            |                                                        |
| Potri.004G000100 |           |            |                                                        |
| Potri.004G011300 |           |            |                                                        |
| Potri.004G011400 |           |            |                                                        |
| Potri.004G025300 |           |            |                                                        |
| Potri.004G025600 | AT4G05200 | CRK25      | cysteine-rich RLK<br>(RECEPTOR-like protein kinase) 25 |
| Potri.004G025700 | AT4G23180 | CRK10,RLK4 | cysteine-rich RLK<br>(RECEPTOR-like protein kinase) 10 |
| Potri.004G095000 |           |            |                                                        |
| Potri.004G096700 |           |            |                                                        |
| Potri.004G096800 |           |            |                                                        |
| Potri.004G117300 |           |            |                                                        |

|                  |           |                        |                                                     |
|------------------|-----------|------------------------|-----------------------------------------------------|
| Potri.004G117400 |           |                        |                                                     |
| Potri.004G169400 |           |                        |                                                     |
| Potri.004G169500 |           |                        |                                                     |
| Potri.004G186300 |           |                        |                                                     |
| Potri.004G194200 | AT3G03740 | ATBPM4,BPM4            | BTB-POZ and MATH domain 4                           |
| Potri.004G194300 |           |                        |                                                     |
| Potri.004G194400 | AT5G17770 | ATCBR,CBR,CBR1         | NADH:cytochrome B5 reductase 1                      |
| Potri.004G194500 |           |                        |                                                     |
| Potri.004G194600 | AT3G62020 | GLP10                  | germin-like protein 10                              |
| Potri.004G194700 |           |                        |                                                     |
| Potri.004G194800 |           |                        |                                                     |
| Potri.004G195200 |           |                        |                                                     |
| Potri.004G195300 |           |                        |                                                     |
| Potri.005G003900 |           |                        |                                                     |
| Potri.005G004000 |           |                        |                                                     |
| Potri.005G004100 |           |                        |                                                     |
| Potri.005G004200 |           |                        |                                                     |
| Potri.005G004300 | AT1G02500 | AtSAM1,MAT1,SAM-1,SAM1 | S-adenosylmethionine synthetase 1                   |
| Potri.005G004400 |           |                        |                                                     |
| Potri.005G004500 |           |                        |                                                     |
| Potri.005G004600 |           |                        |                                                     |
| Potri.005G011800 |           |                        |                                                     |
| Potri.005G011900 |           |                        |                                                     |
| Potri.005G012000 |           |                        |                                                     |
| Potri.005G012200 | AT5G37640 | UBQ9                   | ubiquitin 9                                         |
| Potri.005G012300 |           |                        |                                                     |
| Potri.005G014700 | AT4G21390 | B120                   | S-locus lectin protein kinase family protein        |
| Potri.005G014800 | AT4G21390 | B120                   | S-locus lectin protein kinase family protein        |
| Potri.005G041300 | AT4G26090 | RPS2                   | NB-ARC domain-containing disease resistance protein |
| Potri.005G042900 |           |                        |                                                     |
| Potri.005G043000 |           |                        |                                                     |
| Potri.005G043100 |           |                        |                                                     |
| Potri.005G125200 | AT2G18500 | ATOFP7,OFP7            | ovate family protein 7                              |
| Potri.005G241600 |           |                        |                                                     |
| Potri.006G013500 |           |                        |                                                     |
| Potri.006G060900 |           |                        |                                                     |
| Potri.006G082400 |           |                        |                                                     |
| Potri.006G082500 | AT3G53620 | AtPPa4,PPa4            | pyrophosphorylase 4                                 |
| Potri.006G117800 | AT3G53030 | SRPK4                  | ser/arg-rich protein kinase 4                       |
| Potri.006G189400 |           |                        |                                                     |
| Potri.006G189500 |           |                        |                                                     |
| Potri.006G194700 | AT5G06650 | GIS2                   | C2H2 and C2HC zinc fingers superfamily protein      |
| Potri.006G271500 | AT2G24610 | ATCNGC14,CNGC14        | cyclic nucleotide-gated channel                     |

|                  |           |                                  |                                                 |
|------------------|-----------|----------------------------------|-------------------------------------------------|
| Potri.006G271600 |           |                                  |                                                 |
| Potri.006G271700 |           |                                  |                                                 |
| Potri.006G271800 |           |                                  |                                                 |
| Potri.006G273300 |           |                                  |                                                 |
| Potri.006G273400 |           |                                  |                                                 |
| Potri.006G273500 |           |                                  |                                                 |
| Potri.006G273600 |           |                                  |                                                 |
| Potri.006G273700 |           |                                  |                                                 |
| Potri.006G273800 |           |                                  |                                                 |
| Potri.006G273900 |           |                                  |                                                 |
| Potri.006G274000 |           |                                  |                                                 |
| Potri.006G274100 | AT2G24490 | ATRPA2,ATRPA32A,ROR1,RPA2,RPA32A | replicon protein A2                             |
| Potri.006G274200 |           |                                  |                                                 |
| Potri.006G274300 |           |                                  |                                                 |
| Potri.007G087200 | AT2G22125 | CSII                             | binding                                         |
| Potri.007G116900 | AT1G77120 | ADH,ADH1,ATADH,ATADH1            | alcohol dehydrogenase 1                         |
| Potri.007G117000 | AT5G38280 | PR5K                             | PR5-like receptor kinase                        |
| Potri.007G117100 |           |                                  |                                                 |
| Potri.007G117200 | AT2G43840 | UGT74F1                          | UDP-glycosyltransferase 74 F1                   |
| Potri.007G132100 |           |                                  |                                                 |
| Potri.007G132200 |           |                                  |                                                 |
| Potri.007G132300 |           |                                  |                                                 |
| Potri.007G132900 |           |                                  |                                                 |
| Potri.007G133000 | AT2G01570 | RGA,RGA1                         | GRAS family transcription factor family protein |
| Potri.007G133100 |           |                                  |                                                 |
| Potri.007G133200 |           |                                  |                                                 |
| Potri.007G133300 |           |                                  |                                                 |
| Potri.007G141000 | AT5G38280 | PR5K                             | PR5-like receptor kinase                        |
| Potri.007G141100 |           |                                  |                                                 |
| Potri.007G141200 |           |                                  |                                                 |
| Potri.007G141600 |           |                                  |                                                 |
| Potri.007G142500 |           |                                  |                                                 |
| Potri.007G143100 |           |                                  |                                                 |
| Potri.007G143200 |           |                                  |                                                 |
| Potri.008G022800 |           |                                  |                                                 |
| Potri.008G022900 |           |                                  |                                                 |
| Potri.008G023000 |           |                                  |                                                 |
| Potri.008G023500 |           |                                  |                                                 |
| Potri.008G024800 |           |                                  |                                                 |
| Potri.008G024900 |           |                                  |                                                 |
| Potri.008G025000 |           |                                  |                                                 |
| Potri.008G174500 | AT5G43900 | ATMYA2,MYA2,XI-2,XI-6            | myosin 2                                        |
| Potri.008G190200 |           |                                  |                                                 |
| Potri.009G055500 |           |                                  |                                                 |
| Potri.009G055600 |           |                                  |                                                 |

|                  |           |                             |                                                          |
|------------------|-----------|-----------------------------|----------------------------------------------------------|
| Potri.009G139500 |           |                             |                                                          |
| Potri.009G139600 | AT4G38460 | GGR                         | geranylgeranyl reductase                                 |
| Potri.010G007000 |           |                             |                                                          |
| Potri.010G007100 |           |                             |                                                          |
| Potri.010G044400 |           |                             |                                                          |
| Potri.010G044500 | AT1G70560 | SAV3,TAA1,WEI8              | tryptophan aminotransferase of Arabidopsis 1             |
| Potri.010G044600 |           |                             |                                                          |
| Potri.010G044700 | AT1G60780 | HAP13                       | Clathrin adaptor complexes medium subunit family protein |
| Potri.011G016100 |           |                             |                                                          |
| Potri.011G016200 |           |                             |                                                          |
| Potri.011G018000 |           |                             |                                                          |
| Potri.011G018100 |           |                             |                                                          |
| Potri.011G019500 |           |                             |                                                          |
| Potri.011G019600 |           |                             |                                                          |
| Potri.011G019700 |           |                             |                                                          |
| Potri.011G068600 | AT4G18710 | ATSK21,BIN2,DWF12,SK21,UCU1 | Protein kinase superfamily protein                       |
| Potri.011G117400 |           |                             |                                                          |
| Potri.012G007700 |           |                             |                                                          |
| Potri.012G011800 |           |                             |                                                          |
| Potri.012G012000 |           |                             |                                                          |
| Potri.012G012100 |           |                             |                                                          |
| Potri.012G012200 |           |                             |                                                          |
| Potri.012G012500 |           |                             |                                                          |
| Potri.012G012600 |           |                             |                                                          |
| Potri.012G029600 |           |                             |                                                          |
| Potri.012G029700 |           |                             |                                                          |
| Potri.012G029800 |           |                             |                                                          |
| Potri.012G029900 |           |                             |                                                          |
| Potri.012G030600 |           |                             |                                                          |
| Potri.012G030700 |           |                             |                                                          |
| Potri.012G030800 |           |                             |                                                          |
| Potri.012G046200 | AT1G74000 | SS3                         | strictosidine synthase 3                                 |
| Potri.012G046300 |           |                             |                                                          |
| Potri.012G051300 |           |                             |                                                          |
| Potri.012G051400 | AT1G08510 | FATB                        | fatty acyl-ACP thioesterases B                           |
| Potri.012G070600 |           |                             |                                                          |
| Potri.012G095800 | AT5G63420 | emb2746                     | RNA-metabolising metallo-beta-lactamase family protein   |
| Potri.012G122800 |           |                             |                                                          |
| Potri.013G037700 | AT3G04870 | PDE181,SPC1,ZDS             | zeta-carotene desaturase                                 |
| Potri.013G037800 |           |                             |                                                          |
| Potri.013G089400 |           |                             |                                                          |
| Potri.013G101800 |           |                             |                                                          |
| Potri.013G104400 | AT1G58350 | ZW18                        | Putative serine esterase family protein                  |

|                  |           |                    |                                                    |
|------------------|-----------|--------------------|----------------------------------------------------|
| Potri.013G104500 | AT1G33980 | ATUPF3,UPF3        | Smg-4/UPF3 family protein                          |
| Potri.013G104600 |           |                    |                                                    |
| Potri.013G104700 | AT4G09900 | ATMES12,MES12      | methyl esterase 12                                 |
| Potri.013G105400 |           |                    |                                                    |
| Potri.013G105500 |           |                    |                                                    |
| Potri.013G105600 |           |                    |                                                    |
| Potri.013G105700 |           |                    |                                                    |
| Potri.013G105800 |           |                    |                                                    |
| Potri.013G133800 |           |                    |                                                    |
| Potri.013G133900 |           |                    |                                                    |
| Potri.013G146200 | AT2G20810 | GAUT10,LGT4        | galacturonosyltransferase 10                       |
| Potri.013G146300 |           |                    |                                                    |
| Potri.013G146400 |           |                    |                                                    |
| Potri.013G146500 |           |                    |                                                    |
| Potri.014G002800 |           |                    |                                                    |
| Potri.014G003000 |           |                    |                                                    |
| Potri.014G003100 |           |                    |                                                    |
| Potri.014G004100 | AT3G20000 | TOM40              | translocase of the outer mitochondrial membrane 40 |
| Potri.014G004200 |           |                    |                                                    |
| Potri.014G004500 |           |                    |                                                    |
| Potri.014G004600 |           |                    |                                                    |
| Potri.014G005400 |           |                    |                                                    |
| Potri.014G010100 |           |                    |                                                    |
| Potri.014G010200 | AT3G20000 | TOM40              | translocase of the outer mitochondrial membrane 40 |
| Potri.014G010300 | AT3G20020 | ATPRMT6,PRMT6      | protein arginine methyltransferase 6               |
| Potri.014G033900 | AT2G26560 | PLA IIA,PLA2A,PLP2 | phospholipase A 2A                                 |
| Potri.014G054200 |           |                    |                                                    |
| Potri.014G054300 |           |                    |                                                    |
| Potri.014G054400 |           |                    |                                                    |
| Potri.014G054500 | AT4G39120 | HISN7,IMPL2        | myo-inositol monophosphatase like 2                |
| Potri.014G128300 |           |                    |                                                    |
| Potri.014G128400 | AT3G53760 | ATGCP4,GCP4        | GAMMA-TUBULIN COMPLEX PROTEIN 4                    |
| Potri.015G019000 |           |                    |                                                    |
| Potri.015G019100 | AT5G53130 | ATCNGC1,CNGC1      | cyclic nucleotide gated channel 1                  |
| Potri.015G021700 |           |                    |                                                    |
| Potri.015G024400 |           |                    |                                                    |
| Potri.015G024500 |           |                    |                                                    |
| Potri.015G024900 |           |                    |                                                    |
| Potri.015G025000 |           |                    |                                                    |
| Potri.015G025100 |           |                    |                                                    |
| Potri.015G026200 |           |                    |                                                    |
| Potri.015G026300 |           |                    |                                                    |
| Potri.015G041000 | AT1G18100 | E12A11,MFT         | PEBP                                               |

|                  |           |                                                      |                                                           |
|------------------|-----------|------------------------------------------------------|-----------------------------------------------------------|
| Potri.015G041300 | AT3G18080 | BGLU44                                               | (phosphatidylethanolamine-binding protein) family protein |
| Potri.015G041400 |           |                                                      | B-S glucosidase 44                                        |
| Potri.015G059200 |           |                                                      |                                                           |
| Potri.015G059300 |           |                                                      |                                                           |
| Potri.015G094200 |           |                                                      |                                                           |
| Potri.015G111900 | AT2G35160 | SGD9,SUVH5                                           | SU(VAR)3-9 homolog 5                                      |
| Potri.015G112000 |           |                                                      |                                                           |
| Potri.015G112300 | AT4G25130 | PMSR4                                                | peptide met sulfoxide reductase 4                         |
| Potri.015G112400 |           |                                                      |                                                           |
| Potri.015G112500 |           |                                                      |                                                           |
| Potri.015G112600 |           |                                                      |                                                           |
| Potri.015G112700 |           |                                                      |                                                           |
| Potri.015G113000 | AT5G45130 | ATRAB-F2A,ATRAB5A,ATRABF2A,RAB-F2A,RAB5A,RABF2A,RHA1 | RAB homolog 1                                             |
| Potri.015G113100 |           |                                                      |                                                           |
| Potri.015G113200 |           |                                                      |                                                           |
| Potri.015G113300 | AT5G14345 | AtENODL21,ENODL21                                    | early nodulin-like protein 21                             |
| Potri.015G113400 |           |                                                      |                                                           |
| Potri.015G113800 |           |                                                      |                                                           |
| Potri.015G113900 |           |                                                      |                                                           |
| Potri.015G115400 | AT5G45110 | ATNPR3,NPR3                                          | NPR1-like protein 3                                       |
| Potri.015G115500 |           |                                                      |                                                           |
| Potri.015G115600 | AT5G14345 | AtENODL21,ENODL21                                    | early nodulin-like protein 21                             |
| Potri.015G118600 |           |                                                      |                                                           |
| Potri.015G118700 |           |                                                      |                                                           |
| Potri.015G118800 | AT1G31200 | ATPP2-A9,PP2-A9                                      | phloem protein 2-A9                                       |
| Potri.015G118900 | AT1G10155 | ATPP2-A10,PP2-A10                                    | phloem protein 2-A10                                      |
| Potri.015G119400 |           |                                                      |                                                           |
| Potri.015G119500 |           |                                                      |                                                           |
| Potri.015G119600 |           |                                                      |                                                           |
| Potri.015G119700 |           |                                                      |                                                           |
| Potri.015G119800 |           |                                                      |                                                           |
| Potri.015G119900 |           |                                                      |                                                           |
| Potri.015G120000 | AT1G31200 | ATPP2-A9,PP2-A9                                      | phloem protein 2-A9                                       |
| Potri.015G120300 | AT5G24560 | AtPP2-B12,PP2-B12                                    | phloem protein 2-B12                                      |
| Potri.015G120400 | AT1G31190 | IMPL1                                                | myo-inositol monophosphatase like 1                       |
| Potri.015G120500 |           |                                                      |                                                           |
| Potri.015G120600 |           |                                                      |                                                           |
| Potri.015G120700 |           |                                                      |                                                           |
| Potri.015G121900 |           |                                                      |                                                           |
| Potri.015G122000 | AT5G38280 | PR5K                                                 | PR5-like receptor kinase                                  |
| Potri.015G122100 | AT2G35150 | EXL1                                                 | EXORDIUM like 1                                           |
| Potri.015G122200 |           |                                                      |                                                           |
| Potri.015G122300 |           |                                                      |                                                           |



|                  |           |               |                                                         |
|------------------|-----------|---------------|---------------------------------------------------------|
| Potri.015G123700 |           |               |                                                         |
| Potri.015G123800 |           |               |                                                         |
| Potri.015G123900 | AT2G35110 | GRL,NAP1,NAPP | transcription activators                                |
| Potri.016G011500 |           |               |                                                         |
| Potri.016G012200 |           |               |                                                         |
| Potri.016G027500 |           |               |                                                         |
| Potri.016G027600 | AT3G56910 | PSRP5         | plastid-specific 50S ribosomal protein 5                |
| Potri.016G027700 |           |               |                                                         |
| Potri.016G038900 | AT3G57090 | BIGYIN,FIS1A  | Tetratricopeptide repeat (TPR)-like superfamily protein |
| Potri.016G039000 | AT1G16390 | 3-Oct,ATOCT3  | organic cation/carnitine transporter 3                  |
| Potri.016G039100 |           |               |                                                         |
| Potri.016G039200 |           |               |                                                         |
| Potri.016G039500 |           |               |                                                         |
| Potri.016G039600 |           |               |                                                         |
| Potri.016G039700 |           |               |                                                         |
| Potri.016G039800 |           |               |                                                         |
| Potri.016G039900 |           |               |                                                         |
| Potri.016G040000 |           |               |                                                         |
| Potri.016G092700 |           |               |                                                         |
| Potri.016G092800 |           |               |                                                         |
| Potri.017G015100 |           |               |                                                         |
| Potri.017G015200 |           |               |                                                         |
| Potri.017G015500 |           |               |                                                         |
| Potri.017G015600 |           |               |                                                         |
| Potri.017G024200 |           |               |                                                         |
| Potri.017G024900 |           |               |                                                         |
| Potri.017G025000 |           |               |                                                         |
| Potri.017G027900 | AT3G13710 | PRA1.F4       | prenylated RAB acceptor 1.F4                            |
| Potri.017G081200 |           |               |                                                         |
| Potri.017G092200 |           |               |                                                         |
| Potri.017G095600 | AT3G51550 | FER           | Malectin/receptor-like protein kinase family protein    |
| Potri.017G095700 | AT3G29780 | RALFL27       | ralf-like 27                                            |
| Potri.017G095800 |           |               |                                                         |
| Potri.017G095900 | AT3G51550 | FER           | Malectin/receptor-like protein kinase family protein    |
| Potri.017G104300 |           |               |                                                         |
| Potri.017G108200 |           |               |                                                         |
| Potri.017G108300 |           |               |                                                         |
| Potri.017G108400 |           |               |                                                         |
| Potri.017G117200 |           |               |                                                         |
| Potri.017G117300 |           |               |                                                         |
| Potri.017G117400 |           |               |                                                         |
| Potri.017G123500 |           |               |                                                         |
| Potri.017G123600 |           |               |                                                         |

|                  |           |                    |                                                                 |
|------------------|-----------|--------------------|-----------------------------------------------------------------|
| Potri.017G123700 | AT3G45980 | H2B,HTB9           | Histone superfamily protein                                     |
| Potri.017G123800 |           |                    |                                                                 |
| Potri.017G137000 | AT5G40990 | GLIP1              | GDSL lipase 1                                                   |
| Potri.017G152200 |           |                    |                                                                 |
| Potri.017G152300 |           |                    |                                                                 |
| Potri.017G152500 |           |                    |                                                                 |
| Potri.017G152600 |           |                    |                                                                 |
| Potri.017G152700 |           |                    |                                                                 |
| Potri.018G004500 |           |                    |                                                                 |
| Potri.018G004600 |           |                    |                                                                 |
| Potri.018G004800 | AT4G16130 | ARA1,ATISA1,ISA1   | arabinose kinase                                                |
| Potri.018G004900 |           |                    |                                                                 |
| Potri.018G005000 |           |                    |                                                                 |
| Potri.018G008300 |           |                    |                                                                 |
| Potri.018G008400 | AT4G31540 | ATEXO70G1,EXO70G1  | exocyst subunit exo70 family protein G1                         |
| Potri.018G108000 |           |                    |                                                                 |
| Potri.018G108100 |           |                    |                                                                 |
| Potri.018G145500 | AT5G35330 | ATMBD2,MBD02,MBD2  | methyl-CPG-binding domain protein 02                            |
| Potri.018G145600 |           |                    |                                                                 |
| Potri.018G145700 | AT4G16130 | ARA1,ATISA1,ISA1   | arabinose kinase                                                |
| Potri.018G148300 | AT1G16120 | WAKL1              | wall associated kinase-like 1                                   |
| Potri.018G148400 |           |                    |                                                                 |
| Potri.019G005900 |           |                    |                                                                 |
| Potri.019G006000 |           |                    |                                                                 |
| Potri.019G014900 | AT2G26560 | PLA IIA,PLA2A,PLP2 | phospholipase A 2A                                              |
| Potri.019G015000 | AT2G14050 | MCM9               | minichromosome maintenance 9                                    |
| Potri.019G015700 |           |                    |                                                                 |
| Potri.019G019700 |           |                    |                                                                 |
| Potri.019G020000 | AT3G04460 | APM4,ATPEX12,PEX12 | peroxin-12                                                      |
| Potri.019G020100 |           |                    |                                                                 |
| Potri.019G020200 |           |                    |                                                                 |
| Potri.019G020300 |           |                    |                                                                 |
| Potri.019G041400 |           |                    |                                                                 |
| Potri.019G069400 |           |                    |                                                                 |
| Potri.019G069500 |           |                    |                                                                 |
| Potri.019G094700 |           |                    |                                                                 |
| Potri.019G094800 |           |                    |                                                                 |
| Potri.019G096500 |           |                    |                                                                 |
| Potri.019G096600 |           |                    |                                                                 |
| Potri.019G096700 |           |                    |                                                                 |
| Potri.019G096800 |           |                    |                                                                 |
| Potri.019G096900 |           |                    |                                                                 |
| Potri.019G097000 |           |                    |                                                                 |
| Potri.019G105200 | AT4G03320 | tic20-IV           | translocon at the inner envelope membrane of chloroplasts 20-IV |

Potri.019G105300

Potri.019G106200

Potri.019G106800

Potri.019G106900

Potri.019G108300

Potri.019G108400

Potri.019G108700

Potri.019G108800 AT4G03320 tic20-IV

Potri.019G110800

Potri.019G110900

---

translocon at the inner envelope  
membrane of chloroplasts 20-IV

**Table S9.** Functional gene categories enriched for genes located within regions displaying significantly low genetic differentiation between *P. tremula* and *P. tremuloides*.

| GO term    | Ontology | Description                             | P-value  | FDR     |
|------------|----------|-----------------------------------------|----------|---------|
| GO:0012501 | P        | programmed cell death                   | 4.1e-17  | 2.7e-15 |
| GO:0006915 | P        | apoptosis                               | 4.1e-17  | 2.7e-15 |
| GO:0016265 | P        | death                                   | 1.5e-16  | 4.8e-15 |
| GO:0008219 | P        | cell death                              | 1.5e-16  | 4.8e-15 |
| GO:0002376 | P        | immune system process                   | 1.8e-07  | 3.4e-06 |
| GO:0006955 | P        | immune response                         | 1.8e-07  | 3.4e-06 |
| GO:0045087 | P        | innate immune response                  | 1.8e-07  | 3.4e-06 |
| GO:0006952 | P        | defense response                        | 2.3e-06  | 3.8e-05 |
| GO:0009987 | P        | cellular process                        | 7.2e-06  | 0.00011 |
| GO:0007165 | P        | signal transduction                     | 0.00014  | 0.0019  |
| GO:0006796 | P        | phosphate metabolic process             | 0.00036  | 0.004   |
| GO:0006793 | P        | phosphorus metabolic process            | 0.00036  | 0.004   |
| GO:0023046 | P        | signaling process                       | 0.00046  | 0.0043  |
| GO:0023060 | P        | signal transmission                     | 0.00046  | 0.0043  |
| GO:0016310 | P        | phosphorylation                         | 0.00051  | 0.0045  |
| GO:0023052 | P        | signaling                               | 0.00077  | 0.0064  |
| GO:0043687 | P        | post-translational protein modification | 0.0013   | 0.01    |
| GO:0006468 | P        | protein amino acid phosphorylation      | 0.0014   | 0.01    |
| GO:0006950 | P        | response to stress                      | 0.0015   | 0.011   |
| GO:0006464 | P        | protein modification process            | 0.0035   | 0.023   |
| GO:0065004 | P        | protein-DNA complex assembly            | 0.0047   | 0.024   |
| GO:0050896 | P        | response to stimulus                    | 0.0048   | 0.024   |
| GO:0043412 | P        | macromolecule modification              | 0.0051   | 0.024   |
| GO:0034728 | P        | nucleosome organization                 | 0.0047   | 0.024   |
| GO:0031497 | P        | chromatin assembly                      | 0.0047   | 0.024   |
| GO:0006334 | P        | nucleosome assembly                     | 0.0047   | 0.024   |
| GO:0006333 | P        | chromatin assembly or disassembly       | 0.0052   | 0.024   |
| GO:0006323 | P        | DNA packaging                           | 0.0047   | 0.024   |
| GO:0071103 | P        | DNA conformation change                 | 0.0074   | 0.034   |
| GO:0006996 | P        | organelle organization                  | 0.0093   | 0.041   |
| GO:0051049 | P        | regulation of transport                 | 0.012    | 0.047   |
| GO:0032879 | P        | regulation of localization              | 0.012    | 0.047   |
| GO:0044070 | P        | regulation of anion transport           | 0.012    | 0.047   |
| GO:0043269 | P        | regulation of ion transport             | 0.012    | 0.047   |
| GO:0043531 | F        | ADP binding                             | 2.4e-17  | 2.1e-15 |
| GO:0005524 | F        | ATP binding                             | 7,00E-12 | 2.1e-10 |
| GO:0032559 | F        | adenyl ribonucleotide binding           | 7,00E-12 | 2.1e-10 |
| GO:0032555 | F        | purine ribonucleotide binding           | 1.4e-11  | 2.4e-10 |
| GO:0032553 | F        | ribonucleotide binding                  | 1.4e-11  | 2.4e-10 |
| GO:0030554 | F        | adenyl nucleotide binding               | 9.9e-11  | 1.2e-09 |

|            |   |                                                                 |         |         |
|------------|---|-----------------------------------------------------------------|---------|---------|
| GO:0001882 | F | nucleoside binding                                              | 1.1e-10 | 1.2e-09 |
| GO:0001883 | F | purine nucleoside binding                                       | 9.9e-11 | 1.2e-09 |
| GO:0017076 | F | purine nucleotide binding                                       | 1.8e-10 | 1.8e-09 |
| GO:0000166 | F | nucleotide binding                                              | 1.5e-09 | 1.3e-08 |
| GO:0005515 | F | protein binding                                                 | 3.8e-06 | 2.6e-05 |
| GO:0004888 | F | transmembrane receptor activity                                 | 3.6e-06 | 2.6e-05 |
| GO:0004872 | F | receptor activity                                               | 3.9e-06 | 2.6e-05 |
| GO:0060089 | F | molecular transducer activity                                   | 0.00039 | 0.0023  |
| GO:0004871 | F | signal transducer activity                                      | 0.00039 | 0.0023  |
| GO:0005488 | F | binding                                                         | 0.0019  | 0.0098  |
| GO:0004672 | F | protein kinase activity                                         | 0.0018  | 0.0098  |
| GO:0016301 | F | kinase activity                                                 | 0.004   | 0.02    |
| GO:0016772 | F | transferase activity, transferring phosphorus-containing groups | 0.0055  | 0.024   |
| GO:0016773 | F | phosphotransferase activity, alcohol group as acceptor          | 0.0056  | 0.024   |
| GO:0004437 | F | inositol or phosphatidylinositol phosphatase activity           | 0.0097  | 0.041   |
| GO:0044422 | C | organelle part                                                  | 0.0024  | 0.025   |
| GO:0000785 | C | chromatin                                                       | 0.0027  | 0.025   |
| GO:0000786 | C | nucleosome                                                      | 0.0027  | 0.025   |
| GO:0044446 | C | intracellular organelle part                                    | 0.0024  | 0.025   |
| GO:0032993 | C | protein-DNA complex                                             | 0.0027  | 0.025   |

---
